# Supplementary material for: Chemometric Classification of Cocoa Bean Shells Based on Their Polyphenolic Profile Determined by RP-HPLC-PDA Analysis and Spectrophotometric Assays
Source: MDPI journal article supplement (doi:10.3390/antiox10101533), 2021-09-27
Supplement: s1 [file s1]

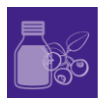

# Chemometric Classification of Cocoa Bean Shells Based on their Polyphenolic Profile Determined by RP-HPLC-PDA Analysis and Spectrophotometric Assays

Olga Rojo-Poveda <sup>1,2,\*</sup>, Giuseppe Zeppa <sup>1</sup>, Ilario Ferrocino <sup>1</sup>, Caroline Stévigny <sup>2</sup>, and Letricia Barbosa-Pereira <sup>1,3</sup>

<sup>1</sup> Department of Agriculture, Forestry and Food Sciences (DISAFA), University of Turin, 10095 Grugliasco, Italy; giuseppe.zeppa@unito.it (G.Z.); ilario.ferrocino@unito.it (I.F.); letricia.barbosa.pereira@usc.es (L.B.-P.)

<sup>2</sup> RD3 Department-Unit of Pharmacognosy, Bioanalysis and Drug Discovery, Faculty of Pharmacy, Université libre de Bruxelles, 1050 Brussels, Belgium; Caroline.Stevigny@ulb.be

<sup>3</sup> Department of Analytical Chemistry, Nutrition and Food Science, Faculty of Pharmacy, University of Santiago de Compostela, 15782 Santiago de Compostela, Spain

\* Correspondence: Olga.Rojo.Poveda@ulb.be

**Abstract:** The cocoa bean shell (CBS), a by-product from the cocoa industry, has been recently proposed as a functional and low-cost ingredient, mainly because of its content in polyphenols. However, vegetal food products could significantly differ in their chemical composition depending on different factors such as their geographical provenience. This work is aimed to determine the polyphenolic and methylxanthine profile of different CBS samples and utilize it for achieving their differentiation according to their geographical origin and variety. RP-HPLC-PDA was used to determine the CBS polyphenolic profile. Spectrophotometric assays were used to obtain the total phenolic, flavonoid, and tannin contents, as well as to evaluate their radical scavenging activity. The results obtained from both methods were then compared and used for the CBS differentiation according to their origin and varieties through chemometric analysis. RP-HPLC-PDA allowed to determine 25 polyphenolic compounds, as well as the methylxanthines theobromine and caffeine. Polyphenolic profile results highlighted significant differences among the analyzed samples, allowing for their differentiation based on their geographical provenience. Similar results were achieved with the results of the spectrophotometric assays, considered as screening methods. Differentiation based on CBS variety was instead obtained based on the HPLC-determined methylxanthine profile.

**Keywords:** cocoa bean shell; cocoa by-product; RP-HPLC-PDA; spectrophotometric assays; radical scavenging activity; principal component analysis; polyphenols; methylxanthines, fingerprints; cocoa markers

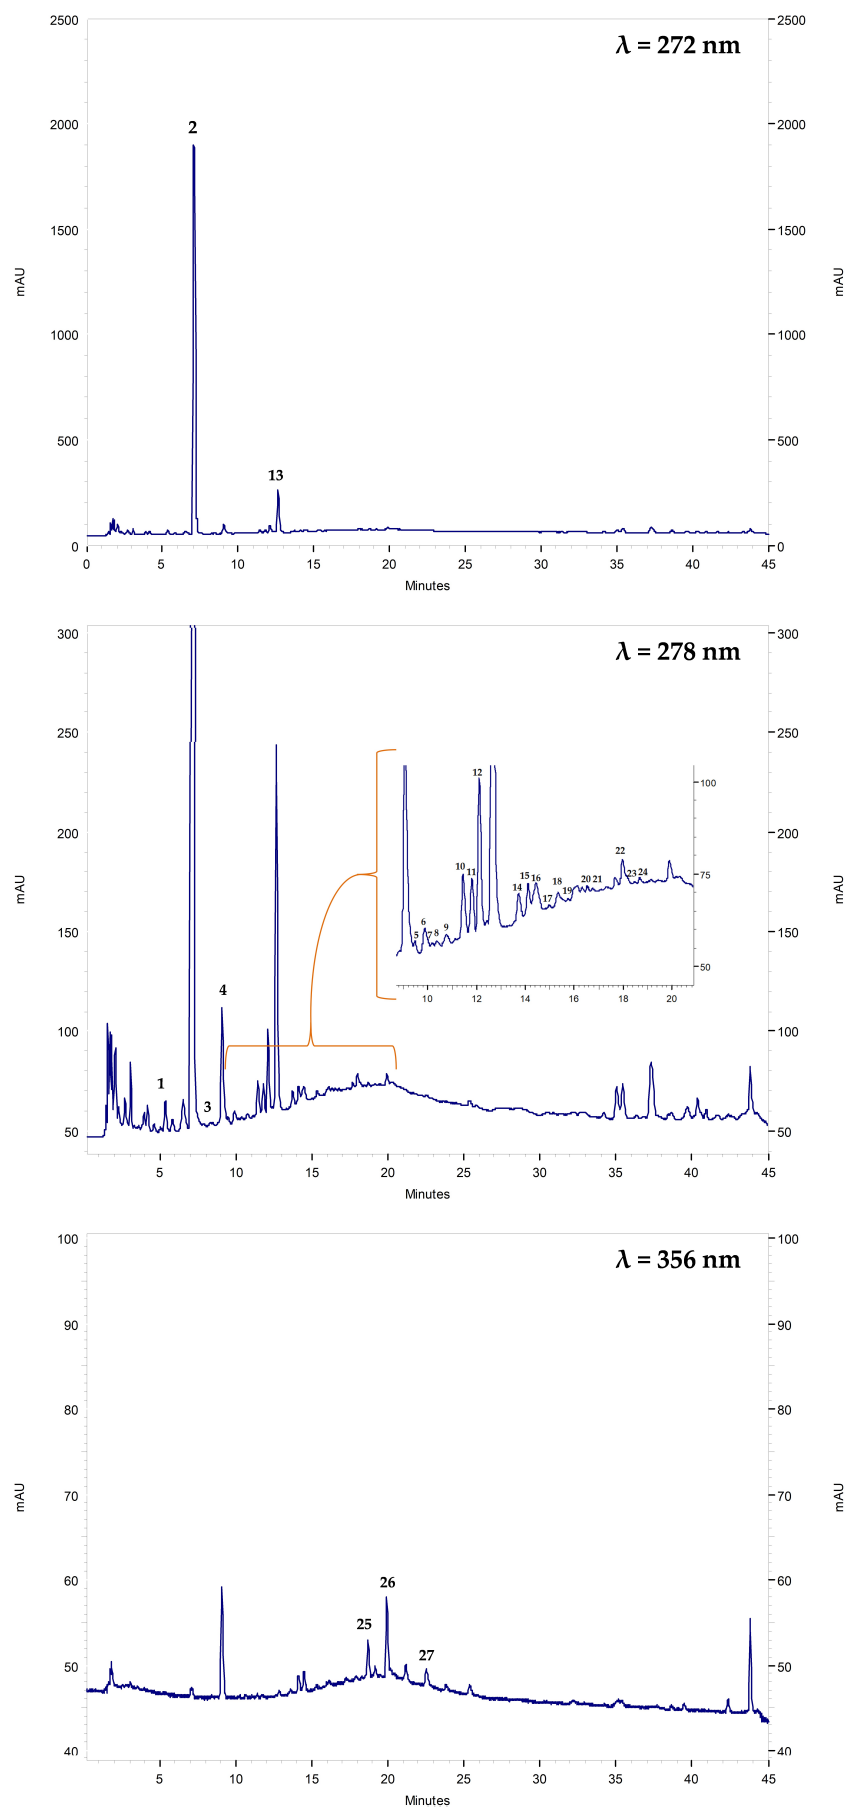

**Figure S1.** RP-HPLC-PDA chromatograms of a representative CBS extract recorded at 272 nm, 278 nm, and 356 nm

**Table S1.** Content of the single identified polyphenolic compounds and methylxanthines in CBS powders from different geographical origins and cultivars. Data are presented as the mean (n=4) ± standard deviation.

| POLYPHENOLS                                 | Concentration (mg kg <sup>-1</sup> of CBS) |                   |                   |                  |                   |                   |                  |                   |                  |                   |                   |
|---------------------------------------------|--------------------------------------------|-------------------|-------------------|------------------|-------------------|-------------------|------------------|-------------------|------------------|-------------------|-------------------|
|                                             | BRA                                        | CAM1              | CAM2              | COL1             | COL2              | CON1              | CON2             | DOR1              | DOR2             | DOR3              | DOR4              |
| <b>Phenolic acids</b>                       |                                            |                   |                   |                  |                   |                   |                  |                   |                  |                   |                   |
| Protocatechuic acid                         | 11.9 ± 0.8                                 | 112 ± 3           | 28 ± 2            | 122 ± 5          | 130 ± 8           | 138 ± 8           | 141 ± 9          | 176 ± 9           | 136 ± 10         | 131 ± 3           | 141 ± 6           |
| Σ                                           | <b>11.9 ± 0.8</b>                          | <b>112 ± 3</b>    | <b>28 ± 2</b>     | <b>122 ± 5</b>   | <b>130 ± 8</b>    | <b>138 ± 8</b>    | <b>141 ± 9</b>   | <b>176 ± 9</b>    | <b>136 ± 10</b>  | <b>131 ± 3</b>    | <b>141 ± 6</b>    |
| <b>Flavan-3-ol</b>                          |                                            |                   |                   |                  |                   |                   |                  |                   |                  |                   |                   |
| Catechin                                    | 15 ± 1                                     | 20 ± 2            | 13.5 ± 0.5        | 66 ± 6           | 128 ± 7           | 14.2 ± 0.1        | 26 ± 2           | 95 ± 2            | 76 ± 6           | 46 ± 2            | 59 ± 5            |
| Epicatechin                                 | 44 ± 4                                     | 96 ± 1            | 43 ± 5            | 279 ± 21         | 731 ± 10          | 72 ± 1            | 154 ± 9          | 493 ± 45          | 169 ± 9          | 181 ± 23          | 229 ± 17          |
| Σ                                           | <b>58 ± 5</b>                              | <b>116 ± 2</b>    | <b>57 ± 5</b>     | <b>344 ± 22</b>  | <b>859 ± 12</b>   | <b>86 ± 1</b>     | <b>180 ± 9</b>   | <b>588 ± 45</b>   | <b>245 ± 11</b>  | <b>227 ± 23</b>   | <b>288 ± 18</b>   |
| <b>Catechin-3-O-glucosides</b>              |                                            |                   |                   |                  |                   |                   |                  |                   |                  |                   |                   |
| Catechin-3-O-glucoside                      | 31 ± 3                                     | 32 ± 1            | 17 ± 1            | 26 ± 1           | 41 ± 4            | 16.2 ± 0.6        | 67 ± 4           | 71 ± 4            | 39 ± 3           | 13.7 ± 0.9        | 48 ± 2            |
| Σ                                           | <b>31 ± 3</b>                              | <b>32 ± 1</b>     | <b>17 ± 1</b>     | <b>26 ± 1</b>    | <b>41 ± 4</b>     | <b>16.2 ± 0.6</b> | <b>67 ± 4</b>    | <b>71 ± 4</b>     | <b>39 ± 3</b>    | <b>13.7 ± 0.9</b> | <b>48 ± 2</b>     |
| <b>Procyanidins B-tvne (PCB)</b>            |                                            |                   |                   |                  |                   |                   |                  |                   |                  |                   |                   |
| PCB                                         | 9.8 ± 0.8                                  | 68 ± 8            | 16.1 ± 0.4        | 210 ± 21         | 289 ± 29          | 274 ± 30          | 141 ± 16         | 584 ± 21          | 275 ± 21         | 78 ± 11           | 236 ± 26          |
| Σ                                           | <b>9.8 ± 0.8</b>                           | <b>68 ± 8</b>     | <b>16.1 ± 0.4</b> | <b>210 ± 21</b>  | <b>289 ± 29</b>   | <b>274 ± 30</b>   | <b>141 ± 16</b>  | <b>584 ± 21</b>   | <b>275 ± 21</b>  | <b>78 ± 11</b>    | <b>236 ± 26</b>   |
| <b>Procyanidins B-tvne (PCB) trimers</b>    |                                            |                   |                   |                  |                   |                   |                  |                   |                  |                   |                   |
| PCB trimer 1                                | 48 ± 4                                     | 11.2 ± 0.1        | 0.9 ± 0.1         | 34 ± 2           | 74 ± 5            | 19.9 ± 0.2        | 13.3 ± 0.6       | 76 ± 3            | 54 ± 4           | 12.8 ± 0.9        | 48 ± 6            |
| PCB trimer 2                                | 4.8 ± 0.3                                  | 3.99 ± 0.03       | 3.1 ± 0.2         | 3.0 ± 0.2        | 23 ± 1            | 4.6 ± 0.1         | 8.9 ± 0.7        | 37 ± 3            | 34 ± 3           | 2.0 ± 0.2         | 19 ± 2            |
| PCB trimer 3                                | 10 ± 1                                     | 14 ± 2            | 1.6 ± 0.2         | 8.3 ± 0.5        | 3.4 ± 0.3         | 18.5 ± 0.4        | 20 ± 2           | 14 ± 1            | 17 ± 2           | 20.7 ± 0.5        | 12 ± 2            |
| PCB trimer 4                                | 32 ± 3                                     | 90 ± 2            | 22.7 ± 0.7        | 140 ± 14         | 200 ± 21          | 38 ± 2            | 81 ± 7           | 126 ± 12          | 65 ± 4           | 114 ± 9           | 85 ± 4            |
| PCB trimer 5                                | 79 ± 9                                     | 32 ± 3            | 14 ± 2            | 128 ± 11         | 280 ± 26          | 44 ± 2            | 82 ± 6           | 235 ± 3           | 87 ± 6           | 53 ± 3            | 57 ± 6            |
| PCB trimer 6                                | 1.7 ± 0.1                                  | 8.0 ± 0.9         | 1.1 ± 0.2         | 10 ± 1           | 12 ± 1            | 1.45 ± 0.03       | 6.7 ± 0.6        | 18 ± 2            | 7.1 ± 0.6        | 28.7 ± 0.9        | 12.6 ± 0.8        |
| PCB trimer 7                                | 21 ± 2                                     | 23 ± 1            | 2.5 ± 0.1         | 40 ± 5           | 58 ± 5            | 22.8 ± 0.9        | 25 ± 1           | 95 ± 7            | 41 ± 3           | 21.0 ± 0.2        | 42 ± 3            |
| Σ                                           | <b>195 ± 10</b>                            | <b>181 ± 4</b>    | <b>46 ± 2</b>     | <b>363 ± 18</b>  | <b>650 ± 34</b>   | <b>150 ± 3</b>    | <b>238 ± 9</b>   | <b>601 ± 15</b>   | <b>305 ± 9</b>   | <b>252 ± 10</b>   | <b>276 ± 10</b>   |
| <b>Procyanidins A-tvne (PCA) glucosides</b> |                                            |                   |                   |                  |                   |                   |                  |                   |                  |                   |                   |
| PCA hexoside 1                              | 41 ± 3                                     | 143 ± 4           | 16 ± 1            | 218 ± 3          | 284 ± 24          | 70 ± 3            | 165 ± 13         | 178 ± 14          | 155 ± 14         | 141 ± 9           | 198 ± 10          |
| PCA pentoside 1                             | 20 ± 2                                     | 17.9 ± 0.8        | 3.2 ± 0.4         | 30 ± 1           | 65 ± 8            | 21.3 ± 0.9        | 15.1 ± 0.4       | 66 ± 4            | 61 ± 6           | 19 ± 2            | 36 ± 3            |
| PCA trimer arabinoside                      | 13 ± 2                                     | 20.0 ± 0.9        | 2.4 ± 0.3         | 34 ± 2           | 69 ± 5            | 18 ± 2            | 35 ± 2           | 83 ± 9            | 36 ± 4           | 14 ± 2            | 34 ± 1            |
| PCA hexoside 2                              | 20 ± 1                                     | 30.0 ± 0.8        | 6.9 ± 0.4         | 33 ± 3           | 54 ± 2            | 14 ± 1            | 37 ± 3           | 69 ± 3            | 34 ± 2           | 8.2 ± 0.4         | 28 ± 3            |
| PCA pentoside 2                             | 9.5 ± 0.3                                  | 14.6 ± 0.5        | 3.56 ± 0.02       | 23 ± 3           | 25 ± 3            | 4.8 ± 0.4         | 18 ± 2           | 28 ± 1            | 9.7 ± 0.7        | 1.7 ± 0.1         | 13.5 ± 0.8        |
| Σ                                           | <b>103 ± 4</b>                             | <b>225 ± 5</b>    | <b>32 ± 2</b>     | <b>339 ± 6</b>   | <b>497 ± 26</b>   | <b>128 ± 4</b>    | <b>271 ± 14</b>  | <b>425 ± 17</b>   | <b>296 ± 15</b>  | <b>184 ± 9</b>    | <b>310 ± 11</b>   |
| <b>Flavonols</b>                            |                                            |                   |                   |                  |                   |                   |                  |                   |                  |                   |                   |
| Quercetin                                   | 3.5 ± 0.3                                  | 3.4 ± 0.2         | 1.1 ± 0.1         | 6.6 ± 0.5        | 9 ± 1             | 3.3 ± 0.4         | 5.5 ± 0.3        | 10.3 ± 0.7        | 3.1 ± 0.2        | 1.4 ± 0.1         | 7.0 ± 0.3         |
| Σ                                           | <b>3.5 ± 0.3</b>                           | <b>3.4 ± 0.2</b>  | <b>1.1 ± 0.1</b>  | <b>6.6 ± 0.5</b> | <b>9 ± 1</b>      | <b>3.3 ± 0.4</b>  | <b>5.5 ± 0.3</b> | <b>10.3 ± 0.7</b> | <b>3.1 ± 0.2</b> | <b>1.4 ± 0.1</b>  | <b>7.0 ± 0.3</b>  |
| <b>Flavonol-3-O-glucosides</b>              |                                            |                   |                   |                  |                   |                   |                  |                   |                  |                   |                   |
| Quercetin-3-O-glucoside                     | 6.4 ± 0.4                                  | 8.41 ± 0.05       | 5.1 ± 0.3         | 23 ± 2           | 37 ± 3            | 17.7 ± 0.5        | 12.9 ± 0.7       | 35 ± 3            | 26 ± 2           | 5.4 ± 0.2         | 22 ± 1            |
| Quercetin-3-O-arabinoside                   | 33 ± 3                                     | 22.2 ± 0.1        | 7.1 ± 0.5         | 33 ± 4           | 52 ± 4            | 30 ± 2            | 28 ± 4           | 59 ± 2            | 46 ± 3           | 13.9 ± 0.7        | 39 ± 2            |
| Σ                                           | <b>39 ± 3</b>                              | <b>30.6 ± 0.1</b> | <b>12.2 ± 0.5</b> | <b>56 ± 4</b>    | <b>89 ± 5</b>     | <b>47 ± 2</b>     | <b>41 ± 4</b>    | <b>94 ± 4</b>     | <b>72 ± 4</b>    | <b>19.3 ± 0.7</b> | <b>62 ± 3</b>     |
| <b>N-phenylpropanoyl-L-aminoacids</b>       |                                            |                   |                   |                  |                   |                   |                  |                   |                  |                   |                   |
| N-Coumaroyl-L-aspartate 1                   | 3.9 ± 0.2                                  | 10.5 ± 0.2        | 7.5 ± 0.5         | 6.2 ± 0.4        | 9.4 ± 0.5         | 5.6 ± 0.3         | 9.2 ± 0.6        | 6.4 ± 0.4         | 9.3 ± 0.7        | 9.9 ± 0.5         | 6.1 ± 0.5         |
| N-Caffeoyl-L-aspartate                      | 24 ± 1                                     | 62 ± 2            | 14 ± 1            | 153 ± 7          | 409 ± 7           | 123 ± 9           | 102 ± 9          | 371 ± 10          | 295 ± 26         | 37 ± 2            | 211 ± 20          |
| N-Coumaroyl-L-aspartate 2                   | 5.6 ± 0.4                                  | 20.6 ± 0.9        | 4.70 ± 0.01       | 46 ± 4           | 104 ± 9           | 52 ± 4            | 33 ± 2           | 149 ± 10          | 124 ± 7          | 14.5 ± 0.8        | 148 ± 14          |
| N-Coumaroyl-L-glutamate                     | 4.0 ± 0.3                                  | 4.0 ± 0.1         | 1.1 ± 0.1         | 3.4 ± 0.2        | 6.9 ± 0.6         | 6.8 ± 0.1         | 3.7 ± 0.2        | 10 ± 1            | 9.2 ± 0.6        | 3.1 ± 0.1         | 5.4 ± 0.6         |
| N-coumaroyl-L-tyrosine                      | 3.1 ± 0.3                                  | 8.6 ± 0.4         | 2.2 ± 0.1         | 12 ± 1           | 14.9 ± 0.5        | 10.3 ± 0.3        | 13 ± 2           | 49 ± 2            | 22 ± 2           | 3.2 ± 0.1         | 24 ± 2            |
| Σ                                           | <b>41 ± 1</b>                              | <b>105 ± 2</b>    | <b>29 ± 1</b>     | <b>220 ± 8</b>   | <b>543 ± 12</b>   | <b>197 ± 10</b>   | <b>161 ± 9</b>   | <b>584 ± 15</b>   | <b>459 ± 27</b>  | <b>68 ± 2</b>     | <b>395 ± 24</b>   |
| <b>Total polyphenols</b>                    | <b>493 ± 13</b>                            | <b>874 ± 11</b>   | <b>238 ± 6</b>    | <b>1686 ± 37</b> | <b>3108 ± 56</b>  | <b>1040 ± 33</b>  | <b>1244 ± 29</b> | <b>3134 ± 57</b>  | <b>1831 ± 41</b> | <b>975 ± 29</b>   | <b>1762 ± 43</b>  |
| METHYLXANTHINES                             | Concentration (g kg <sup>-1</sup> of CBS)  |                   |                   |                  |                   |                   |                  |                   |                  |                   |                   |
|                                             | BRA                                        | CAM1              | CAM2              | COL1             | COL2              | CON1              | CON2             | DOR1              | DOR2             | DOR3              | DOR4              |
| Theobromine                                 | 3.4 ± 0.2                                  | 6.5 ± 0.1         | 3.0 ± 0.3         | 6.1 ± 0.4        | 8.2 ± 0.1         | 7.2 ± 0.4         | 7.5 ± 0.2        | 9.0 ± 0.1         | 7.4 ± 0.3        | 2.4 ± 0.2         | 8.5 ± 0.1         |
| Caffeine                                    | 0.69 ± 0.04                                | 0.74 ± 0.01       | 0.163 ± 0.003     | 1.2 ± 0.1        | 2.57 ± 0.05       | 1.2 ± 0.1         | 0.94 ± 0.03      | 3.3 ± 0.1         | 1.9 ± 0.2        | 0.51 ± 0.04       | 2.6 ± 0.1         |
| <b>Total Methylxanthines</b>                | <b>4.1 ± 0.2</b>                           | <b>7.3 ± 0.1</b>  | <b>3.2 ± 0.3</b>  | <b>7.3 ± 0.4</b> | <b>10.7 ± 0.1</b> | <b>8.4 ± 0.4</b>  | <b>8.4 ± 0.2</b> | <b>12.3 ± 0.1</b> | <b>9.3 ± 0.4</b> | <b>2.9 ± 0.2</b>  | <b>11.1 ± 0.2</b> |

**Table S1 (continuation).** Content of the single identified polyphenolic compounds and methylxanthines in CBS powders from different geographical origins and cultivars. Data are presented as the mean (n=4) ± standard deviation.

| POLYPHENOLS                                 | Concentration (mg kg <sup>-1</sup> of CBS) |                   |                   |                   |                   |                   |                   |                   |                   |                   |                     |
|---------------------------------------------|--------------------------------------------|-------------------|-------------------|-------------------|-------------------|-------------------|-------------------|-------------------|-------------------|-------------------|---------------------|
|                                             | ECU1                                       | ECU2              | ECU3              | ECU4              | ECU5              | ECU6              | ECU7              | GHA               | IVC               | JAM               | MAD                 |
| <b>Phenolic acids</b>                       |                                            |                   |                   |                   |                   |                   |                   |                   |                   |                   |                     |
| Protocatechuic acid                         | 99 ± 9                                     | 122 ± 9           | 206 ± 19          | 145 ± 2           | 113 ± 8           | 88 ± 5            | 108 ± 3           | 20.9 ± 0.8        | 54 ± 4            | 187 ± 18          | 87 ± 4              |
| Σ                                           | <b>99 ± 9</b>                              | <b>122 ± 9</b>    | <b>206 ± 19</b>   | <b>145 ± 2</b>    | <b>113 ± 8</b>    | <b>88 ± 5</b>     | <b>108 ± 3</b>    | <b>20.9 ± 0.8</b> | <b>54 ± 4</b>     | <b>187 ± 18</b>   | <b>87 ± 4</b>       |
| <b>Flavan-3-ol</b>                          |                                            |                   |                   |                   |                   |                   |                   |                   |                   |                   |                     |
| Catechin                                    | 46 ± 4                                     | 46 ± 2            | 114 ± 11          | 45 ± 3            | 48 ± 1            | 88 ± 5            | 180 ± 2           | 12.7 ± 0.5        | 27 ± 2            | 85 ± 3            | 139 ± 10            |
| Epicatechin                                 | 203 ± 20                                   | 168 ± 7           | 366 ± 7           | 368 ± 13          | 239.29 ± 0.04     | 374 ± 6           | 256 ± 13          | 4.5 ± 0.3         | 50 ± 7            | 161 ± 16          | 749 ± 62            |
| Σ                                           | <b>250 ± 20</b>                            | <b>214 ± 8</b>    | <b>480 ± 13</b>   | <b>414 ± 14</b>   | <b>287 ± 1</b>    | <b>462 ± 8</b>    | <b>437 ± 13</b>   | <b>17.2 ± 0.6</b> | <b>77 ± 7</b>     | <b>245 ± 16</b>   | <b>888 ± 63</b>     |
| <b>Catechin-3-O-glucosides</b>              |                                            |                   |                   |                   |                   |                   |                   |                   |                   |                   |                     |
| Catechin-3-O-glucoside                      | 25 ± 2                                     | 12.1 ± 0.7        | 48 ± 1            | 22 ± 1            | 27.2 ± 0.1        | 15.6 ± 0.2        | 37 ± 3            | 6.8 ± 0.1         | 21 ± 1            | 58 ± 2            | 31.5 ± 0.6          |
| Σ                                           | <b>25 ± 2</b>                              | <b>12.1 ± 0.7</b> | <b>48 ± 1</b>     | <b>22 ± 1</b>     | <b>27.2 ± 0.1</b> | <b>15.6 ± 0.2</b> | <b>37 ± 3</b>     | <b>6.8 ± 0.1</b>  | <b>21 ± 1</b>     | <b>58 ± 2</b>     | <b>31.5 ± 0.6</b>   |
| <b>Procyanidins B-tvne (PCB)</b>            |                                            |                   |                   |                   |                   |                   |                   |                   |                   |                   |                     |
| PCB                                         | 310 ± 23                                   | 167 ± 14          | 233 ± 12          | 198 ± 10          | 96 ± 8            | 277 ± 28          | 52 ± 2            | 6.8 ± 0.4         | 46 ± 5            | 57 ± 6            | 478 ± 19            |
| Σ                                           | <b>310 ± 23</b>                            | <b>167 ± 14</b>   | <b>233 ± 12</b>   | <b>198 ± 10</b>   | <b>96 ± 8</b>     | <b>277 ± 28</b>   | <b>52 ± 2</b>     | <b>6.8 ± 0.4</b>  | <b>46 ± 5</b>     | <b>57 ± 6</b>     | <b>478 ± 19</b>     |
| <b>Procyanidins B-tvne (PCB) trimers</b>    |                                            |                   |                   |                   |                   |                   |                   |                   |                   |                   |                     |
| PCB trimer 1                                | 31 ± 1                                     | 18 ± 2            | 82 ± 5            | 39.7 ± 0.7        | 50 ± 5            | 33 ± 2            | 65 ± 3            | 2.5 ± 0.2         | 16 ± 1            | 131 ± 9           | 51.5 ± 0.9          |
| PCB trimer 2                                | 8.1 ± 0.5                                  | 3.3 ± 0.3         | 15.7 ± 0.5        | 2.6 ± 0.1         | 0.0 ± 0.0         | 24 ± 2            | 41 ± 3            | 0.5 ± 0.1         | 2.3 ± 0.2         | 163 ± 12          | 20 ± 2              |
| PCB trimer 3                                | 10.9 ± 0.9                                 | 5.7 ± 0.6         | 23.2 ± 0.7        | 14 ± 1            | 2.6 ± 0.1         | 11.9 ± 0.9        | 9.6 ± 0.5         | 3.6 ± 0.3         | 3.5 ± 0.4         | 8.4 ± 0.9         | 20 ± 2              |
| PCB trimer 4                                | 82 ± 7                                     | 73 ± 5            | 122 ± 10          | 124 ± 5           | 122 ± 13          | 112 ± 12          | 95 ± 3            | 7.6 ± 0.7         | 25 ± 3            | 67 ± 8            | 169 ± 13            |
| PCB trimer 5                                | 49 ± 6                                     | 50 ± 7            | 140 ± 6           | 51 ± 2            | 9.2 ± 0.9         | 73 ± 7            | 24 ± 2            | 6.5 ± 0.8         | 9.1 ± 0.8         | 46 ± 4            | 183 ± 14            |
| PCB trimer 6                                | 9 ± 1                                      | 0.0 ± 0.0         | 9.7 ± 0.9         | 12.3 ± 0.5        | 11.9 ± 0.7        | 4.3 ± 0.5         | 2.65 ± 0.02       | 2.1 ± 0.2         | 2.2 ± 0.3         | 7.3 ± 0.4         | 9.9 ± 0.3           |
| PCB trimer 7                                | 25.6 ± 0.9                                 | 11 ± 1            | 84 ± 1            | 4.7 ± 0.5         | 19.2 ± 0.8        | 39 ± 1            | 47 ± 4            | 3.4 ± 0.3         | 16 ± 1            | 32 ± 1            | 65 ± 4              |
| Σ                                           | <b>216 ± 9</b>                             | <b>162 ± 9</b>    | <b>476 ± 13</b>   | <b>248 ± 5</b>    | <b>214 ± 14</b>   | <b>298 ± 14</b>   | <b>284 ± 7</b>    | <b>26 ± 1</b>     | <b>74 ± 3</b>     | <b>455 ± 17</b>   | <b>518 ± 20</b>     |
| <b>Procyanidins A-tvne (PCA) glucosides</b> |                                            |                   |                   |                   |                   |                   |                   |                   |                   |                   |                     |
| PCA hexoside 1                              | 222 ± 31                                   | 87 ± 4            | 334 ± 20          | 172 ± 5           | 183 ± 7           | 136 ± 8           | 159 ± 12          | 8.5 ± 0.4         | 43.2 ± 0.8        | 171 ± 16          | 308 ± 8             |
| PCA pentoside 1                             | 29 ± 2                                     | 12.7 ± 0.9        | 47 ± 6            | 99 ± 11           | 31.98 ± 0.03      | 199 ± 16          | 28 ± 2            | 1.3 ± 0.1         | 2.6 ± 0.3         | 39 ± 3            | 30.1 ± 0.5          |
| PCA trimer arabinoside                      | 23 ± 3                                     | 14.1 ± 0.7        | 65 ± 3            | 7.5 ± 0.2         | 46 ± 3            | 13 ± 1            | 43 ± 3            | 3.4 ± 0.4         | 14 ± 2            | 39 ± 3            | 48 ± 4              |
| PCA hexoside 2                              | 20 ± 2                                     | 8.4 ± 0.8         | 40 ± 3            | 23 ± 2            | 25 ± 3            | 17 ± 2            | 40.1 ± 0.8        | 2.5 ± 0.1         | 5.9 ± 0.7         | 25 ± 3            | 18 ± 1              |
| PCA pentoside 2                             | 7.2 ± 0.4                                  | n.d.              | 10 ± 1            | 5.5 ± 0.3         | 6.6 ± 0.8         | 5.8 ± 0.3         | 22.3 ± 0.9        | 0.65 ± 0.03       | 2.5 ± 0.3         | 13 ± 1            | 7.3 ± 0.2           |
| Σ                                           | <b>302 ± 31</b>                            | <b>122 ± 4</b>    | <b>496 ± 22</b>   | <b>306 ± 12</b>   | <b>294 ± 8</b>    | <b>371 ± 18</b>   | <b>292 ± 12</b>   | <b>16.3 ± 0.6</b> | <b>68 ± 2</b>     | <b>287 ± 16</b>   | <b>412 ± 9</b>      |
| <b>Flavonols</b>                            |                                            |                   |                   |                   |                   |                   |                   |                   |                   |                   |                     |
| Quercetin                                   | 2.6 ± 0.1                                  | 3.1 ± 0.3         | 9.9 ± 0.9         | 6.9 ± 0.4         | 3.0 ± 0.3         | 6.1 ± 0.6         | 2.8 ± 0.2         | 1.29 ± 0.04       | 1.1 ± 0.1         | 6.8 ± 0.9         | 6.9 ± 0.1           |
| Σ                                           | <b>2.6 ± 0.1</b>                           | <b>3.1 ± 0.3</b>  | <b>9.9 ± 0.9</b>  | <b>6.9 ± 0.4</b>  | <b>3.0 ± 0.3</b>  | <b>6.1 ± 0.6</b>  | <b>2.8 ± 0.2</b>  | <b>1.3 ± 0.0</b>  | <b>1.1 ± 0.1</b>  | <b>6.8 ± 0.9</b>  | <b>6.9 ± 0.1</b>    |
| <b>Flavonol-3-O-glucosides</b>              |                                            |                   |                   |                   |                   |                   |                   |                   |                   |                   |                     |
| Quercetin-3-O-glucoside                     | 14.1 ± 0.9                                 | 8.8 ± 0.4         | 48 ± 2            | 21.49 ± 0.04      | 14 ± 2            | 16 ± 1            | 21.2 ± 0.7        | 3.5 ± 0.4         | 5.3 ± 0.3         | 23.1 ± 0.6        | 23 ± 1              |
| Quercetin-3-O-arabinoside                   | 21 ± 2                                     | 15.0 ± 0.4        | 64 ± 1            | 35.1 ± 0.7        | 23.0 ± 0.1        | 20 ± 1            | 44.2 ± 0.4        | 3.8 ± 0.2         | 8.1 ± 0.7         | 53.2 ± 0.8        | 27.2 ± 0.8          |
| Σ                                           | <b>35 ± 2</b>                              | <b>23.8 ± 0.6</b> | <b>112 ± 2</b>    | <b>56.6 ± 0.7</b> | <b>37 ± 2</b>     | <b>36 ± 2</b>     | <b>65.4 ± 0.8</b> | <b>7.2 ± 0.4</b>  | <b>13.4 ± 0.8</b> | <b>76 ± 1</b>     | <b>50 ± 2</b>       |
| <b>N-phenylpropanoyl-L-aminoacids</b>       |                                            |                   |                   |                   |                   |                   |                   |                   |                   |                   |                     |
| N-Coumaroyl-L-aspartate 1                   | 12.8 ± 0.9                                 | 8.6 ± 0.5         | 14.1 ± 0.7        | 8.2 ± 0.7         | 13.4 ± 0.1        | 5.4 ± 0.3         | 22 ± 1            | 3.7 ± 0.3         | 6.4 ± 0.6         | 25 ± 2            | 5.2 ± 0.1           |
| N-Caffeoyl-L-aspartate                      | 102 ± 7                                    | 50 ± 3            | 431 ± 32          | 124 ± 6           | 57 ± 2            | 180 ± 8           | 138 ± 5           | 5.9 ± 0.4         | 22 ± 2            | 256 ± 17          | 269 ± 2             |
| N-Coumaroyl-L-aspartate 2                   | 25 ± 3                                     | 26 ± 3            | 184 ± 12          | 66 ± 3            | 65.8 ± 0.5        | 64 ± 6            | 94 ± 2            | 4.5 ± 0.5         | 11 ± 1            | 133 ± 3           | 75 ± 3              |
| N-Coumaroyl-L-glutamate                     | 4.8 ± 0.4                                  | 2.5 ± 0.3         | 8.5 ± 0.9         | 3.40 ± 0.03       | 5.8 ± 0.3         | 7.2 ± 0.7         | 5.3 ± 0.6         | 1.1 ± 0.1         | 4.2 ± 0.4         | 7.8 ± 0.4         | 5.7 ± 0.7           |
| N-coumaroyl-L-tyrosine                      | 12 ± 1                                     | 5.7 ± 0.8         | 29 ± 2            | 11 ± 2            | 17.8 ± 0.6        | 9 ± 1             | 17.5 ± 0.2        | 2.0 ± 0.2         | 6.5 ± 0.8         | 29 ± 1            | 17 ± 1              |
| Σ                                           | <b>155 ± 8</b>                             | <b>93 ± 4</b>     | <b>667 ± 34</b>   | <b>213 ± 7</b>    | <b>160 ± 2</b>    | <b>264 ± 10</b>   | <b>277 ± 6</b>    | <b>17.1 ± 0.7</b> | <b>50 ± 2</b>     | <b>450 ± 17</b>   | <b>371 ± 4</b>      |
| <b>Total polyphenols</b>                    | <b>1394 ± 46</b>                           | <b>919 ± 21</b>   | <b>2728 ± 50</b>  | <b>1610 ± 23</b>  | <b>1231 ± 20</b>  | <b>1818 ± 39</b>  | <b>1556 ± 20</b>  | <b>120 ± 2</b>    | <b>404 ± 10</b>   | <b>1822 ± 39</b>  | <b>2843 ± 70</b>    |
|                                             |                                            |                   |                   |                   |                   |                   |                   |                   |                   |                   |                     |
| METHYLXANTHINES                             | Concentration (g kg <sup>-1</sup> of CBS)  |                   |                   |                   |                   |                   |                   |                   |                   |                   |                     |
|                                             | ECU1                                       | ECU2              | ECU3              | ECU4              | ECU5              | ECU6              | ECU7              | GHA               | IVC               | JAM               | MAD                 |
| Theobromine                                 | 5.9 ± 0.5                                  | 6.0 ± 0.3         | 8.6 ± 0.3         | 7.4 ± 0.1         | 6.3 ± 0.1         | 6.9 ± 0.3         | 8.0 ± 0.7         | 0.8 ± 0.1         | 3.5 ± 0.3         | 8.9 ± 0.2         | 8.25 ± 0.02         |
| Caffeine                                    | 0.95 ± 0.04                                | 1.15 ± 0.03       | 2.1 ± 0.1         | 1.7 ± 0.1         | 1.7 ± 0.1         | 1.2 ± 0.1         | 2.8 ± 0.3         | 0.151 ± 0.004     | 0.67 ± 0.04       | 3.00 ± 0.02       | 2.29 ± 0.01         |
| <b>Total Methylxanthines</b>                | <b>6.8 ± 0.5</b>                           | <b>7.2 ± 0.3</b>  | <b>10.6 ± 0.3</b> | <b>9.1 ± 0.2</b>  | <b>8.0 ± 0.1</b>  | <b>8.1 ± 0.3</b>  | <b>10.8 ± 0.8</b> | <b>0.9 ± 0.1</b>  | <b>4.2 ± 0.3</b>  | <b>11.9 ± 0.2</b> | <b>10.55 ± 0.02</b> |

n.d. = not detected

**Table S1 (continuation).** Content of the single identified polyphenolic compounds and methylxanthines in CBS powders from different geographical origins and cultivars. Data are presented as the mean (n=4)  $\pm$  standard deviation.

| POLYPHENOLS                                 | Concentration (mg kg <sup>-1</sup> of CBS) |                                 |                                  |                                 |                                  |                                  |                                  |                                  |                                 |                                 |                                  |
|---------------------------------------------|--------------------------------------------|---------------------------------|----------------------------------|---------------------------------|----------------------------------|----------------------------------|----------------------------------|----------------------------------|---------------------------------|---------------------------------|----------------------------------|
|                                             | MEX                                        | PER1                            | PER2                             | SAT1                            | SAT2                             | SAT3                             | SLE                              | TAN                              | TOG1                            | TOG2                            | UGA1                             |
| <b>Phenolic acids</b>                       |                                            |                                 |                                  |                                 |                                  |                                  |                                  |                                  |                                 |                                 |                                  |
| Protocatechuic acid                         | 241 $\pm$ 6                                | 120 $\pm$ 7                     | 87 $\pm$ 3                       | 120 $\pm$ 4                     | 198 $\pm$ 11                     | 164 $\pm$ 16                     | 14.4 $\pm$ 0.7                   | 88 $\pm$ 7                       | 14 $\pm$ 1                      | 16 $\pm$ 1                      | 57 $\pm$ 3                       |
| $\Sigma$                                    | <b>241 <math>\pm</math> 6</b>              | <b>120 <math>\pm</math> 7</b>   | <b>87 <math>\pm</math> 3</b>     | <b>120 <math>\pm</math> 4</b>   | <b>198 <math>\pm</math> 11</b>   | <b>164 <math>\pm</math> 16</b>   | <b>14.4 <math>\pm</math> 0.7</b> | <b>88 <math>\pm</math> 7</b>     | <b>14 <math>\pm</math> 1</b>    | <b>16 <math>\pm</math> 1</b>    | <b>57 <math>\pm</math> 3</b>     |
| <b>Flavan-3-ol</b>                          |                                            |                                 |                                  |                                 |                                  |                                  |                                  |                                  |                                 |                                 |                                  |
| Catechin                                    | 93 $\pm$ 5                                 | 61 $\pm$ 4                      | 85 $\pm$ 3                       | 26.4 $\pm$ 0.8                  | 120 $\pm$ 9                      | 114 $\pm$ 7                      | 35 $\pm$ 3                       | 35 $\pm$ 2                       | 19 $\pm$ 1                      | 20 $\pm$ 1                      | 14 $\pm$ 1                       |
| Epicatechin                                 | 430 $\pm$ 12                               | 352 $\pm$ 30                    | 300 $\pm$ 42                     | 325 $\pm$ 29                    | 632 $\pm$ 18                     | 542 $\pm$ 45                     | 191 $\pm$ 14                     | 137 $\pm$ 17                     | 25 $\pm$ 3                      | 37 $\pm$ 2                      | 31 $\pm$ 2                       |
| $\Sigma$                                    | <b>523 <math>\pm</math> 13</b>             | <b>413 <math>\pm</math> 30</b>  | <b>385 <math>\pm</math> 42</b>   | <b>352 <math>\pm</math> 29</b>  | <b>751 <math>\pm</math> 20</b>   | <b>656 <math>\pm</math> 46</b>   | <b>225 <math>\pm</math> 14</b>   | <b>173 <math>\pm</math> 18</b>   | <b>43 <math>\pm</math> 3</b>    | <b>58 <math>\pm</math> 2</b>    | <b>45 <math>\pm</math> 3</b>     |
| <b>Catechin-3-O-glucosides</b>              |                                            |                                 |                                  |                                 |                                  |                                  |                                  |                                  |                                 |                                 |                                  |
| Catechin-3-O-glucoside                      | 89 $\pm$ 4                                 | 27 $\pm$ 2                      | 33 $\pm$ 2                       | 42 $\pm$ 1                      | 101 $\pm$ 3                      | 79 $\pm$ 3                       | 29 $\pm$ 2                       | 17.9 $\pm$ 0.7                   | 27 $\pm$ 2                      | 28 $\pm$ 2                      | 6.4 $\pm$ 0.3                    |
| $\Sigma$                                    | <b>89 <math>\pm</math> 4</b>               | <b>27 <math>\pm</math> 2</b>    | <b>33 <math>\pm</math> 2</b>     | <b>42 <math>\pm</math> 1</b>    | <b>101 <math>\pm</math> 3</b>    | <b>79 <math>\pm</math> 3</b>     | <b>29 <math>\pm</math> 2</b>     | <b>17.9 <math>\pm</math> 0.7</b> | <b>27 <math>\pm</math> 2</b>    | <b>28 <math>\pm</math> 2</b>    | <b>6.4 <math>\pm</math> 0.3</b>  |
| <b>Procyanidins B-tvne (PCB)</b>            |                                            |                                 |                                  |                                 |                                  |                                  |                                  |                                  |                                 |                                 |                                  |
| PCB                                         | 261 $\pm$ 35                               | 138 $\pm$ 2                     | 341 $\pm$ 26                     | 640 $\pm$ 41                    | 191 $\pm$ 20                     | 246 $\pm$ 30                     | 136 $\pm$ 12                     | 253 $\pm$ 18                     | 136 $\pm$ 12                    | 146 $\pm$ 14                    | 129 $\pm$ 5                      |
| $\Sigma$                                    | <b>261 <math>\pm</math> 35</b>             | <b>138 <math>\pm</math> 2</b>   | <b>341 <math>\pm</math> 26</b>   | <b>640 <math>\pm</math> 41</b>  | <b>191 <math>\pm</math> 20</b>   | <b>246 <math>\pm</math> 30</b>   | <b>136 <math>\pm</math> 12</b>   | <b>253 <math>\pm</math> 18</b>   | <b>136 <math>\pm</math> 12</b>  | <b>146 <math>\pm</math> 14</b>  | <b>129 <math>\pm</math> 5</b>    |
| <b>Procyanidins B-tvne (PCB) trimers</b>    |                                            |                                 |                                  |                                 |                                  |                                  |                                  |                                  |                                 |                                 |                                  |
| PCB trimer 1                                | 106 $\pm$ 3                                | 42 $\pm$ 1                      | 51 $\pm$ 5                       | 24 $\pm$ 3                      | 96 $\pm$ 6                       | 65 $\pm$ 7                       | 2.7 $\pm$ 0.1                    | 24 $\pm$ 2                       | 12.0 $\pm$ 0.6                  | 11 $\pm$ 1                      | 10 $\pm$ 1                       |
| PCB trimer 2                                | 19 $\pm$ 1                                 | 1.5 $\pm$ 0.1                   | 12 $\pm$ 1                       | 35 $\pm$ 3                      | 3.5 $\pm$ 0.3                    | 5.9 $\pm$ 0.4                    | 4.7 $\pm$ 0.4                    | 7.6 $\pm$ 0.7                    | 17.3 $\pm$ 0.8                  | 13.0 $\pm$ 0.6                  | n.d.                             |
| PCB trimer 3                                | 12 $\pm$ 1                                 | 10 $\pm$ 1                      | 9.1 $\pm$ 0.7                    | 40 $\pm$ 5                      | 11 $\pm$ 1                       | 10.8 $\pm$ 0.8                   | 1.5 $\pm$ 0.1                    | 9 $\pm$ 1                        | 4.0 $\pm$ 0.4                   | 12 $\pm$ 1                      | 3.1 $\pm$ 0.4                    |
| PCB trimer 4                                | 128 $\pm$ 17                               | 124 $\pm$ 8                     | 159 $\pm$ 11                     | 143 $\pm$ 15                    | 264 $\pm$ 31                     | 242 $\pm$ 30                     | 73 $\pm$ 1                       | 130 $\pm$ 16                     | 14.9 $\pm$ 0.7                  | 17 $\pm$ 2                      | 31 $\pm$ 4                       |
| PCB trimer 5                                | 163 $\pm$ 14                               | 73 $\pm$ 6                      | 56 $\pm$ 6                       | 223 $\pm$ 11                    | 176 $\pm$ 17                     | 132 $\pm$ 3                      | 71 $\pm$ 9                       | 51 $\pm$ 6                       | 74 $\pm$ 7                      | 45 $\pm$ 3                      | 21 $\pm$ 2                       |
| PCB trimer 6                                | 4.7 $\pm$ 0.3                              | 6.2 $\pm$ 0.6                   | 16 $\pm$ 2                       | 2.3 $\pm$ 0.2                   | 14 $\pm$ 1                       | 21 $\pm$ 2                       | 8.1 $\pm$ 0.4                    | 20 $\pm$ 1                       | 7.4 $\pm$ 0.4                   | 4.4 $\pm$ 0.6                   | 3.3 $\pm$ 0.1                    |
| PCB trimer 7                                | 104 $\pm$ 6                                | 16 $\pm$ 1                      | 37 $\pm$ 3                       | 16.0 $\pm$ 0.9                  | 89 $\pm$ 5                       | 89 $\pm$ 11                      | 38 $\pm$ 5                       | 21 $\pm$ 3                       | 25 $\pm$ 3                      | 22 $\pm$ 2                      | 7.1 $\pm$ 0.6                    |
| $\Sigma$                                    | <b>538 <math>\pm</math> 23</b>             | <b>272 <math>\pm</math> 10</b>  | <b>340 <math>\pm</math> 14</b>   | <b>484 <math>\pm</math> 20</b>  | <b>654 <math>\pm</math> 36</b>   | <b>566 <math>\pm</math> 32</b>   | <b>199 <math>\pm</math> 11</b>   | <b>263 <math>\pm</math> 17</b>   | <b>154 <math>\pm</math> 7</b>   | <b>123 <math>\pm</math> 5</b>   | <b>76 <math>\pm</math> 5</b>     |
| <b>Procyanidins A-tvne (PCA) glucosides</b> |                                            |                                 |                                  |                                 |                                  |                                  |                                  |                                  |                                 |                                 |                                  |
| PCA hexoside 1                              | 417 $\pm$ 37                               | 302 $\pm$ 19                    | 236 $\pm$ 6                      | 199 $\pm$ 19                    | 561 $\pm$ 17                     | 479 $\pm$ 60                     | 86 $\pm$ 10                      | 126 $\pm$ 16                     | 20 $\pm$ 2                      | 21.5 $\pm$ 0.8                  | 30 $\pm$ 3                       |
| PCA pentoside 1                             | 49 $\pm$ 7                                 | 31 $\pm$ 2                      | 46 $\pm$ 4                       | 103 $\pm$ 8                     | 75 $\pm$ 7                       | 43 $\pm$ 6                       | 3.1 $\pm$ 0.1                    | 24 $\pm$ 2                       | 10.3 $\pm$ 0.7                  | 21 $\pm$ 2                      | 3.0 $\pm$ 0.2                    |
| PCA trimer arabinoside                      | 114 $\pm$ 4                                | 25 $\pm$ 2                      | 32 $\pm$ 3                       | 43 $\pm$ 2                      | 84 $\pm$ 4                       | 65 $\pm$ 3                       | 13 $\pm$ 1                       | 24 $\pm$ 1                       | 22.0 $\pm$ 0.4                  | 22.0 $\pm$ 0.9                  | 5.8 $\pm$ 0.4                    |
| PCA hexoside 2                              | 46 $\pm$ 4                                 | 46 $\pm$ 3                      | 16 $\pm$ 2                       | 35 $\pm$ 2                      | 73 $\pm$ 7                       | 71 $\pm$ 9                       | 20 $\pm$ 2                       | 12 $\pm$ 1                       | 12.8 $\pm$ 0.9                  | 19 $\pm$ 2                      | 4.5 $\pm$ 0.3                    |
| PCA pentoside 2                             | 31 $\pm$ 4                                 | 14.2 $\pm$ 0.7                  | 21 $\pm$ 2                       | 7.4 $\pm$ 0.3                   | 40 $\pm$ 4                       | 24 $\pm$ 3                       | 7.2 $\pm$ 0.7                    | 14 $\pm$ 1                       | 7 $\pm$ 1                       | 2.4 $\pm$ 0.3                   | 1.6 $\pm$ 0.1                    |
| $\Sigma$                                    | <b>658 <math>\pm</math> 38</b>             | <b>417 <math>\pm</math> 20</b>  | <b>351 <math>\pm</math> 8</b>    | <b>387 <math>\pm</math> 21</b>  | <b>833 <math>\pm</math> 21</b>   | <b>682 <math>\pm</math> 61</b>   | <b>129 <math>\pm</math> 10</b>   | <b>199 <math>\pm</math> 16</b>   | <b>73 <math>\pm</math> 3</b>    | <b>85 <math>\pm</math> 3</b>    | <b>45 <math>\pm</math> 3</b>     |
| <b>Flavonols</b>                            |                                            |                                 |                                  |                                 |                                  |                                  |                                  |                                  |                                 |                                 |                                  |
| Quercetin                                   | 22.4 $\pm$ 0.6                             | 7.5 $\pm$ 0.3                   | 6.3 $\pm$ 0.5                    | 4.7 $\pm$ 0.3                   | 13.9 $\pm$ 0.5                   | 8.0 $\pm$ 0.9                    | 2.0 $\pm$ 0.1                    | 2.9 $\pm$ 0.2                    | 1.1 $\pm$ 0.1                   | 1.4 $\pm$ 0.1                   | 2.0 $\pm$ 0.1                    |
| $\Sigma$                                    | <b>22.4 <math>\pm</math> 0.6</b>           | <b>7.5 <math>\pm</math> 0.3</b> | <b>6.3 <math>\pm</math> 0.5</b>  | <b>4.7 <math>\pm</math> 0.3</b> | <b>13.9 <math>\pm</math> 0.5</b> | <b>8.0 <math>\pm</math> 0.9</b>  | <b>2.0 <math>\pm</math> 0.1</b>  | <b>2.9 <math>\pm</math> 0.2</b>  | <b>1.1 <math>\pm</math> 0.1</b> | <b>1.4 <math>\pm</math> 0.1</b> | <b>2.0 <math>\pm</math> 0.1</b>  |
| <b>Flavonol-3-O-glucosides</b>              |                                            |                                 |                                  |                                 |                                  |                                  |                                  |                                  |                                 |                                 |                                  |
| Quercetin-3-O-glucoside                     | 23 $\pm$ 1                                 | 18 $\pm$ 1                      | 19.8 $\pm$ 0.2                   | 13.1 $\pm$ 0.5                  | 35 $\pm$ 3                       | 21 $\pm$ 1                       | 6.9 $\pm$ 0.2                    | 9.3 $\pm$ 0.9                    | 4.8 $\pm$ 0.5                   | 4.1 $\pm$ 0.4                   | 5.9 $\pm$ 0.7                    |
| Quercetin-3-O-arabinoside                   | 70 $\pm$ 4                                 | 36.6 $\pm$ 0.8                  | 32.2 $\pm$ 0.6                   | 25 $\pm$ 2                      | 87 $\pm$ 5                       | 42 $\pm$ 1                       | 21 $\pm$ 1                       | 23 $\pm$ 1                       | 20 $\pm$ 1                      | 20 $\pm$ 2                      | 10.4 $\pm$ 0.1                   |
| $\Sigma$                                    | <b>93 <math>\pm</math> 4</b>               | <b>55 <math>\pm</math> 1</b>    | <b>51.9 <math>\pm</math> 0.7</b> | <b>38 <math>\pm</math> 2</b>    | <b>122 <math>\pm</math> 6</b>    | <b>62 <math>\pm</math> 2</b>     | <b>28 <math>\pm</math> 1</b>     | <b>32 <math>\pm</math> 2</b>     | <b>24 <math>\pm</math> 1</b>    | <b>24 <math>\pm</math> 2</b>    | <b>16.3 <math>\pm</math> 0.7</b> |
| <b>N-phenylpropanoyl-L-aminoacids</b>       |                                            |                                 |                                  |                                 |                                  |                                  |                                  |                                  |                                 |                                 |                                  |
| N-Coumaroyl-L-aspartate 1                   | 14 $\pm$ 1                                 | 11.1 $\pm$ 0.7                  | 7.1 $\pm$ 0.7                    | 9.4 $\pm$ 0.8                   | 12 $\pm$ 1                       | 14.8 $\pm$ 0.5                   | 4.6 $\pm$ 0.4                    | 6.9 $\pm$ 0.6                    | 3.1 $\pm$ 0.2                   | 2.8 $\pm$ 0.2                   | 4.4 $\pm$ 0.4                    |
| N-Caffeoyl-L-aspartate                      | 653 $\pm$ 40                               | 195 $\pm$ 16                    | 248 $\pm$ 6                      | 141 $\pm$ 13                    | 358 $\pm$ 29                     | 244 $\pm$ 3                      | 37 $\pm$ 1                       | 50 $\pm$ 4                       | 34 $\pm$ 2                      | 23 $\pm$ 2                      | 34 $\pm$ 2                       |
| N-Coumaroyl-L-aspartate 2                   | 94 $\pm$ 3                                 | 85 $\pm$ 3                      | 122 $\pm$ 8                      | 29 $\pm$ 2                      | 118 $\pm$ 8                      | 94 $\pm$ 11                      | 9.4 $\pm$ 0.2                    | 23.5 $\pm$ 0.9                   | 7.2 $\pm$ 0.1                   | 5.4 $\pm$ 0.3                   | 14.9 $\pm$ 0.8                   |
| N-Coumaroyl-L-glutamate                     | 9.4 $\pm$ 0.2                              | 6.2 $\pm$ 0.6                   | 8.4 $\pm$ 0.4                    | 7.4 $\pm$ 0.8                   | 12.6 $\pm$ 0.4                   | 11 $\pm$ 1                       | 3.2 $\pm$ 0.1                    | 5.1 $\pm$ 0.2                    | 9.3 $\pm$ 0.7                   | 9.1 $\pm$ 0.9                   | 3.1 $\pm$ 0.2                    |
| N-coumaroyl-L-tyrosine                      | 40 $\pm$ 2                                 | 13 $\pm$ 2                      | 18 $\pm$ 1                       | 16 $\pm$ 1                      | 38 $\pm$ 3                       | 42 $\pm$ 1                       | 6.9 $\pm$ 0.6                    | 7.3 $\pm$ 0.4                    | 7.3 $\pm$ 0.6                   | 4.5 $\pm$ 0.4                   | 4.9 $\pm$ 0.2                    |
| $\Sigma$                                    | <b>810 <math>\pm</math> 40</b>             | <b>311 <math>\pm</math> 16</b>  | <b>404 <math>\pm</math> 10</b>   | <b>203 <math>\pm</math> 13</b>  | <b>539 <math>\pm</math> 31</b>   | <b>406 <math>\pm</math> 11</b>   | <b>61 <math>\pm</math> 1</b>     | <b>93 <math>\pm</math> 4</b>     | <b>61 <math>\pm</math> 2</b>    | <b>45 <math>\pm</math> 2</b>    | <b>61 <math>\pm</math> 2</b>     |
| <b>Total polyphenols</b>                    | <b>3235 <math>\pm</math> 71</b>            | <b>1759 <math>\pm</math> 41</b> | <b>1999 <math>\pm</math> 53</b>  | <b>2271 <math>\pm</math> 59</b> | <b>3403 <math>\pm</math> 61</b>  | <b>2869 <math>\pm</math> 90</b>  | <b>823 <math>\pm</math> 24</b>   | <b>1123 <math>\pm</math> 35</b>  | <b>534 <math>\pm</math> 15</b>  | <b>526 <math>\pm</math> 16</b>  | <b>438 <math>\pm</math> 9</b>    |
|                                             |                                            |                                 |                                  |                                 |                                  |                                  |                                  |                                  |                                 |                                 |                                  |
| METHYLXANTHINES                             | Concentration (g kg <sup>-1</sup> of CBS)  |                                 |                                  |                                 |                                  |                                  |                                  |                                  |                                 |                                 |                                  |
|                                             |                                            |                                 |                                  |                                 |                                  |                                  |                                  |                                  |                                 |                                 |                                  |
| Theobromine                                 | 8.5 $\pm$ 0.3                              | 6.8 $\pm$ 0.4                   | 8.1 $\pm$ 0.7                    | 7.4 $\pm$ 0.3                   | 8.7 $\pm$ 0.2                    | 8.5 $\pm$ 0.3                    | 4.4 $\pm$ 0.3                    | 6.9 $\pm$ 0.5                    | 4.4 $\pm$ 0.3                   | 3.7 $\pm$ 0.1                   | 4.0 $\pm$ 0.4                    |
| Caffeine                                    | 1.3 $\pm$ 0.1                              | 1.5 $\pm$ 0.1                   | 1.6 $\pm$ 0.1                    | 1.46 $\pm$ 0.05                 | 1.4 $\pm$ 0.1                    | 1.49 $\pm$ 0.04                  | 0.38 $\pm$ 0.03                  | 1.1 $\pm$ 0.1                    | 0.40 $\pm$ 0.04                 | 0.35 $\pm$ 0.02                 | 0.50 $\pm$ 0.03                  |
| <b>Total Methylxanthines</b>                | <b>9.7 <math>\pm</math> 0.3</b>            | <b>8.3 <math>\pm</math> 0.4</b> | <b>9.7 <math>\pm</math> 0.7</b>  | <b>8.9 <math>\pm</math> 0.3</b> | <b>10.1 <math>\pm</math> 0.2</b> | <b>10.0 <math>\pm</math> 0.3</b> | <b>4.7 <math>\pm</math> 0.3</b>  | <b>8.0 <math>\pm</math> 0.5</b>  | <b>4.8 <math>\pm</math> 0.3</b> | <b>4.1 <math>\pm</math> 0.1</b> | <b>4.5 <math>\pm</math> 0.4</b>  |

n.d. = not detected

**Table S1 (continuation).** Content of the single identified polyphenolic compounds and methylxanthines in CBS powders from different geographical origins and cultivars. Data are presented as the mean (n=4) ± standard deviation.

| POLYPHENOLS                                 | Concentration (mg kg <sup>-1</sup> of CBS) |                  |                  |                   |                   |                   |                  |                     |                    |                  |                     |
|---------------------------------------------|--------------------------------------------|------------------|------------------|-------------------|-------------------|-------------------|------------------|---------------------|--------------------|------------------|---------------------|
|                                             | UGA2                                       | VEN1             | VEN2             | VEN3              | VEN4              | VEN5              | VEN6             | VEN7                | VEN8               | VEN9             | VEN10               |
| <b>Phenolic acids</b>                       |                                            |                  |                  |                   |                   |                   |                  |                     |                    |                  |                     |
| Protocatechuic acid                         | 108 ± 8                                    | 119 ± 5          | 73 ± 2           | 108 ± 4           | 46 ± 3            | 121 ± 9           | 124 ± 9          | 104 ± 4             | 136 ± 4            | 86 ± 5           | 12.05 ± 0.02        |
| Σ                                           | <b>108 ± 8</b>                             | <b>119 ± 5</b>   | <b>73 ± 2</b>    | <b>108 ± 4</b>    | <b>46 ± 3</b>     | <b>121 ± 9</b>    | <b>124 ± 9</b>   | <b>104 ± 4</b>      | <b>136 ± 4</b>     | <b>86 ± 5</b>    | <b>12.05 ± 0.02</b> |
| <b>Flavan-3-ol</b>                          |                                            |                  |                  |                   |                   |                   |                  |                     |                    |                  |                     |
| Catechin                                    | 51 ± 5                                     | 21 ± 2           | 35 ± 2           | 73 ± 4            | 53 ± 2            | 56 ± 3            | 66 ± 3           | 133 ± 5             | 118 ± 6            | 127 ± 5          | 77 ± 2              |
| Epicatechin                                 | 16 ± 1                                     | 294 ± 26         | 159 ± 19         | 340 ± 31          | 118 ± 5           | 108 ± 12          | 190 ± 16         | 186 ± 1             | 229 ± 4            | 88 ± 5           | 229.23 ± 0.05       |
| Σ                                           | <b>67 ± 5</b>                              | <b>314 ± 26</b>  | <b>195 ± 19</b>  | <b>412 ± 31</b>   | <b>171 ± 5</b>    | <b>164 ± 12</b>   | <b>256 ± 16</b>  | <b>319 ± 5</b>      | <b>347 ± 7</b>     | <b>215 ± 7</b>   | <b>306 ± 2</b>      |
| <b>Catechin-3-O-glucosides</b>              |                                            |                  |                  |                   |                   |                   |                  |                     |                    |                  |                     |
| Catechin-3-O-glucoside                      | 13 ± 1                                     | 17 ± 1           | 14 ± 1           | 52 ± 5            | 20 ± 1            | 25 ± 1            | 30 ± 2           | 34.8 ± 0.5          | 50 ± 3             | 25 ± 2           | 31.9 ± 0.6          |
| Σ                                           | <b>13 ± 1</b>                              | <b>17 ± 1</b>    | <b>14 ± 1</b>    | <b>52 ± 5</b>     | <b>20 ± 1</b>     | <b>25 ± 1</b>     | <b>30 ± 2</b>    | <b>34.8 ± 0.5</b>   | <b>50 ± 3</b>      | <b>25 ± 2</b>    | <b>31.9 ± 0.6</b>   |
| <b>Procyanidins B-type (PCB)</b>            |                                            |                  |                  |                   |                   |                   |                  |                     |                    |                  |                     |
| PCB                                         | 38 ± 5                                     | 408 ± 53         | 673 ± 52         | 78 ± 4            | 83 ± 3            | 55 ± 3            | 182 ± 10         | 106 ± 9             | 54 ± 2             | 68 ± 5           | 104 ± 12            |
| Σ                                           | <b>38 ± 5</b>                              | <b>408 ± 53</b>  | <b>673 ± 52</b>  | <b>78 ± 4</b>     | <b>83 ± 3</b>     | <b>55 ± 3</b>     | <b>182 ± 10</b>  | <b>106 ± 9</b>      | <b>54 ± 2</b>      | <b>68 ± 5</b>    | <b>104 ± 12</b>     |
| <b>Procyanidins B-type (PCB) trimers</b>    |                                            |                  |                  |                   |                   |                   |                  |                     |                    |                  |                     |
| PCB trimer 1                                | 14 ± 1                                     | 20 ± 1           | 70 ± 5           | 74 ± 2            | 16 ± 1            | 60 ± 5            | 27 ± 1           | 65.1 ± 0.2          | 92 ± 7             | 49 ± 5           | 16.5 ± 0.5          |
| PCB trimer 2                                | 6.7 ± 0.5                                  | 21 ± 2           | 73 ± 8           | 26 ± 1            | 13 ± 2            | 36 ± 3            | 23 ± 1           | 110 ± 3             | 48.4 ± 0.1         | 36 ± 3           | 1.5 ± 0.1           |
| PCB trimer 3                                | 14 ± 1                                     | 16 ± 1           | 97 ± 11          | 53 ± 3            | 17 ± 2            | 30 ± 2            | 18 ± 2           | 20 ± 2              | 10 ± 1             | 8.6 ± 0.7        | 15 ± 2              |
| PCB trimer 4                                | 18 ± 2                                     | 105 ± 10         | 101 ± 5          | 104 ± 10          | 30 ± 1            | 38 ± 1            | 99 ± 6           | 48 ± 5              | 62 ± 4             | 34.4 ± 0.1       | 123 ± 3             |
| PCB trimer 5                                | 13 ± 1                                     | 130 ± 9          | 260 ± 33         | 79 ± 3            | 42 ± 2            | 35 ± 4            | 168 ± 15         | 62 ± 5              | 22 ± 3             | 40 ± 4           | 27 ± 2              |
| PCB trimer 6                                | 3.7 ± 0.2                                  | 7.0 ± 0.8        | 1.6 ± 0.2        | 3.9 ± 0.4         | 0.8 ± 0.1         | 4.5 ± 0.2         | 2.4 ± 0.2        | 2.9 ± 0.1           | 3.63 ± 0.03        | 3.3 ± 0.4        | 8.6 ± 0.1           |
| PCB trimer 7                                | 28 ± 3                                     | 32 ± 2           | 13.8 ± 0.6       | 37 ± 4            | 6.9 ± 0.3         | 16 ± 1            | 38 ± 5           | 35.7 ± 0.3          | 47 ± 4             | 36 ± 4           | 29.5 ± 0.4          |
| Σ                                           | <b>97 ± 4</b>                              | <b>330 ± 14</b>  | <b>617 ± 36</b>  | <b>377 ± 12</b>   | <b>126 ± 3</b>    | <b>220 ± 7</b>    | <b>375 ± 17</b>  | <b>342 ± 8</b>      | <b>286 ± 10</b>    | <b>208 ± 8</b>   | <b>220 ± 4</b>      |
| <b>Procyanidins A-type (PCA) glucosides</b> |                                            |                  |                  |                   |                   |                   |                  |                     |                    |                  |                     |
| PCA hexoside 1                              | 34 ± 4                                     | 172 ± 8          | 34 ± 1           | 315 ± 14          | 56 ± 3            | 62 ± 2            | 131 ± 15         | 181.2 ± 0.3         | 211 ± 21           | 158 ± 14         | 160 ± 11            |
| PCA pentoside 1                             | 3.0 ± 0.4                                  | 34 ± 4           | 98 ± 4           | 65 ± 4            | 13 ± 2            | 15.1 ± 0.6        | 45 ± 4           | 29 ± 2              | 37.5 ± 0.6         | 22 ± 2           | 11 ± 1              |
| PCA trimer arabinoside                      | 7.6 ± 0.3                                  | 32 ± 3           | 24 ± 3           | 34 ± 4            | 16 ± 1            | 25 ± 2            | 37 ± 3           | 25.8 ± 0.2          | 36 ± 1             | 26.8 ± 0.1       | 18 ± 2              |
| PCA hexoside 2                              | 2.7 ± 0.3                                  | 13 ± 1           | 20 ± 2           | 30 ± 2            | 9.2 ± 0.6         | 20 ± 2            | 29 ± 2           | 14.9 ± 0.4          | 29 ± 2             | 12 ± 2           | 11.5 ± 0.1          |
| PCA pentoside 2                             | 0.91 ± 0.05                                | 8.3 ± 0.7        | 2.3 ± 0.2        | 22 ± 3            | 4.8 ± 0.3         | 5.5 ± 0.7         | 9.3 ± 0.1        | 16 ± 2              | 16 ± 1             | 10.3 ± 0.6       | 8.6 ± 0.2           |
| Σ                                           | <b>48 ± 4</b>                              | <b>259 ± 10</b>  | <b>179 ± 6</b>   | <b>467 ± 16</b>   | <b>98 ± 4</b>     | <b>127 ± 3</b>    | <b>252 ± 16</b>  | <b>267 ± 3</b>      | <b>329 ± 21</b>    | <b>230 ± 14</b>  | <b>209 ± 11</b>     |
| <b>Flavonols</b>                            |                                            |                  |                  |                   |                   |                   |                  |                     |                    |                  |                     |
| Quercetin                                   | 2.4 ± 0.2                                  | 3.2 ± 0.3        | 5.9 ± 0.8        | 3.4 ± 0.3         | 2.6 ± 0.1         | 3.3 ± 0.3         | 6.1 ± 0.5        | 1.63 ± 0.02         | 2.94 ± 0.04        | 3.5 ± 0.4        | 2.4 ± 0.1           |
| Σ                                           | <b>2.4 ± 0.2</b>                           | <b>3.2 ± 0.3</b> | <b>5.9 ± 0.8</b> | <b>3.4 ± 0.3</b>  | <b>2.6 ± 0.1</b>  | <b>3.3 ± 0.3</b>  | <b>6.1 ± 0.5</b> | <b>1.63 ± 0.02</b>  | <b>2.94 ± 0.04</b> | <b>3.5 ± 0.4</b> | <b>2.4 ± 0.1</b>    |
| <b>Flavonol-3-O-glucosides</b>              |                                            |                  |                  |                   |                   |                   |                  |                     |                    |                  |                     |
| Quercetin-3-O-glucoside                     | 5.1 ± 0.4                                  | 10.4 ± 0.8       | 18.2 ± 0.6       | 25 ± 2            | 7.1 ± 0.5         | 10.9 ± 0.6        | 20 ± 2           | 12 ± 1              | 21 ± 1             | 6.5 ± 0.2        | 10.6 ± 0.3          |
| Quercetin-3-O-arabinoside                   | 10.6 ± 0.3                                 | 17.5 ± 0.8       | 23 ± 2           | 51 ± 3            | 14.4 ± 0.4        | 22.1 ± 0.7        | 28.7 ± 0.7       | 14.9 ± 0.4          | 37.0 ± 0.8         | 17 ± 1           | 25 ± 1              |
| Σ                                           | <b>15.8 ± 0.5</b>                          | <b>28 ± 1</b>    | <b>42 ± 2</b>    | <b>76 ± 4</b>     | <b>21.5 ± 0.7</b> | <b>33.0 ± 0.9</b> | <b>49 ± 2</b>    | <b>27 ± 1</b>       | <b>58 ± 1</b>      | <b>24 ± 1</b>    | <b>36 ± 1</b>       |
| <b>N-phenylpropanoyl-L-aminoacids</b>       |                                            |                  |                  |                   |                   |                   |                  |                     |                    |                  |                     |
| N-Coumaroyl-L-aspartate 1                   | 13 ± 1                                     | 5.4 ± 0.2        | 1.4 ± 0.1        | 21.3 ± 0.9        | 6.5 ± 0.3         | 19 ± 2            | 9.0 ± 0.6        | 8.69 ± 0.03         | 13.4 ± 0.4         | 5.8 ± 0.3        | 4.2 ± 0.3           |
| N-Caffeoyl-L-aspartate                      | 18 ± 1                                     | 60 ± 3           | 169 ± 16         | 194 ± 10          | 94 ± 9            | 98 ± 5            | 191 ± 17         | 200 ± 4             | 189 ± 4            | 90 ± 2           | 149 ± 6             |
| N-Coumaroyl-L-aspartate 2                   | 21 ± 1                                     | 23 ± 2           | 29 ± 2           | 75 ± 4            | 24 ± 1            | 55 ± 2            | 65 ± 3           | 92 ± 3              | 87 ± 3             | 62 ± 3           | 49 ± 3              |
| N-Coumaroyl-L-glutamate                     | 2.2 ± 0.2                                  | 5.7 ± 0.3        | 9.8 ± 0.6        | 5.2 ± 0.6         | 3.8 ± 0.5         | 3.4 ± 0.4         | 4.3 ± 0.4        | 2.4 ± 0.3           | 5.8 ± 0.7          | 7 ± 1            | 3.2 ± 0.3           |
| N-coumaroyl-L-tyrosine                      | 4.6 ± 0.4                                  | 10 ± 1           | 7.5 ± 0.5        | 23 ± 2            | 4.5 ± 0.2         | 13 ± 1            | 12.1 ± 0.9       | 18.8 ± 0.2          | 26.8 ± 0.5         | 13.9 ± 0.5       | 8 ± 1               |
| Σ                                           | <b>58 ± 2</b>                              | <b>104 ± 4</b>   | <b>217 ± 16</b>  | <b>319 ± 11</b>   | <b>133 ± 9</b>    | <b>188 ± 6</b>    | <b>281 ± 17</b>  | <b>322 ± 5</b>      | <b>322 ± 5</b>     | <b>178 ± 4</b>   | <b>214 ± 7</b>      |
| <b>Total polyphenols</b>                    | <b>449 ± 12</b>                            | <b>1583 ± 62</b> | <b>2015 ± 68</b> | <b>1892 ± 40</b>  | <b>702 ± 13</b>   | <b>937 ± 18</b>   | <b>1555 ± 36</b> | <b>1523 ± 15</b>    | <b>1584 ± 25</b>   | <b>1036 ± 20</b> | <b>1136 ± 18</b>    |
| METHYLXANTHINES                             | Concentration (g kg <sup>-1</sup> of CBS)  |                  |                  |                   |                   |                   |                  |                     |                    |                  |                     |
|                                             | UGA2                                       | VEN1             | VEN2             | VEN3              | VEN4              | VEN5              | VEN6             | VEN7                | VEN8               | VEN9             | VEN10               |
| Theobromine                                 | 6.8 ± 0.3                                  | 6.0 ± 0.4        | 6.5 ± 0.4        | 8.2 ± 0.6         | 3.2 ± 0.1         | 6.0 ± 0.5         | 7.2 ± 0.7        | 7.74 ± 0.03         | 8.4 ± 0.2          | 6.9 ± 0.3        | 5.3 ± 0.2           |
| Caffeine                                    | 0.99 ± 0.01                                | 1.3 ± 0.1        | 2.2 ± 0.1        | 3.0 ± 0.1         | 1.21 ± 0.04       | 2.2 ± 0.2         | 2.6 ± 0.2        | 3.37 ± 0.03         | 3.0 ± 0.1          | 2.6 ± 0.1        | 1.9 ± 0.1           |
| <b>Total Methylxanthines</b>                | <b>7.8 ± 0.3</b>                           | <b>7.2 ± 0.4</b> | <b>8.8 ± 0.4</b> | <b>11.2 ± 0.6</b> | <b>4.4 ± 0.1</b>  | <b>8.3 ± 0.5</b>  | <b>9.9 ± 0.7</b> | <b>11.11 ± 0.05</b> | <b>11.4 ± 0.2</b>  | <b>9.6 ± 0.3</b> | <b>7.2 ± 0.2</b>    |

**Table S2.** Pairwise comparison of the phenolic compounds quantified in CBSs by RP-HPLC-PDA that could be used as potential geographical origin markers for the American and African continents.

|                                  |                                  |                                  |
|----------------------------------|----------------------------------|----------------------------------|
| <u>Protocatechuic_acid</u>       | <u>N-Coumaroyl-L-aspartate_2</u> | <u>PCA_pentoside_1</u>           |
| Africa                           | Africa                           | Africa                           |
| America 0.0023                   | America 2.60E-09                 | America 2.10E-07                 |
| <u>N-Coumaroyl-L-aspartate_1</u> | <u>PCB_trimer_2</u>              | <u>PCB_trimer_7</u>              |
| Africa                           | Africa                           | Africa                           |
| America 0.008                    | America 1.80E-06                 | America 0.0048                   |
| <u>N-Caffeoyl-L-aspartate</u>    | <u>PCB</u>                       | <u>PCA_trimer_arabinoside</u>    |
| Africa                           | Africa                           | Africa                           |
| America 3.10E-08                 | America 0.046                    | America 0.0046                   |
| <u>Catechin</u>                  | <u>Epicatechin</u>               | <u>PCA_hexoside_2</u>            |
| Africa                           | Africa                           | Africa                           |
| America 3.40E-08                 | America 4.10E-06                 | America 0.004                    |
| <u>PCA_hexoside_1</u>            | <u>N-Coumaroyl-L-glutamate</u>   | <u>N-coumaroyl-L-tyrosine</u>    |
| Africa                           | Africa                           | Africa                           |
| America 9.70E-05                 | America 0.41                     | America 0.00025                  |
| <u>Catechin-3-O-glucoside</u>    | <u>PCB_trimer_3</u>              | <u>PCA_pentoside_2</u>           |
| Africa                           | Africa                           | Africa                           |
| America 0.19                     | America 0.0098                   | America 0.005                    |
| <u>Quercetin</u>                 | <u>PCB_trimer_4</u>              | <u>Quercetin-3-O-glucoside</u>   |
| Africa                           | Africa                           | Africa                           |
| America 1.00E-05                 | America 0.0061                   | America 1.60E-08                 |
| <u>PCB_trimer_1</u>              | <u>PCB_trimer_5</u>              | <u>Quercetin-3-O-arabinoside</u> |
| Africa                           | Africa                           | Africa                           |
| America 3.30E-11                 | America 0.0069                   | America 1.90E-05                 |
| <u>PCB_trimer_6</u>              |                                  |                                  |
| Africa                           |                                  |                                  |
| America 0.71                     |                                  |                                  |

FDR (false discovery rate)<0.001; FDR<0.01 and FDR<0.05 are highlighted in green, yellow, and red, respectively. Compounds highlighted in bold were used to build the box plots that are displayed in the main

**Table S3.** Pairwise comparison of the phenolic compounds quantified in CBSs by RP-HPLC-PDA that could be used as potential geographical origin markers for different countries within the African continent.

| Protocatechuic acid |         |         |         |         |         |         |         |         |         |  |
|---------------------|---------|---------|---------|---------|---------|---------|---------|---------|---------|--|
|                     | CAM     | CON     | GHA     | IVC     | MAD     | SAT     | SLE     | TAN     | TOG     |  |
| CON                 | 0.02381 | -       | -       | -       | -       | -       | -       | -       | -       |  |
| GHA                 | 0.05357 | 0.02381 | -       | -       | -       | -       | -       | -       | -       |  |
| IVC                 | 1       | 0.02381 | 0.05357 | -       | -       | -       | -       | -       | -       |  |
| MAD                 | 1       | 0.11285 | 0.17143 | 0.17143 | -       | -       | -       | -       | -       |  |
| SAT                 | 0.00549 | 0.60038 | 0.00549 | 0.00549 | 0.04945 | -       | -       | -       | -       |  |
| SLE                 | 0.17143 | 0.11285 | 0.17143 | 0.17143 | 0.41667 | 0.04945 | -       | -       | -       |  |
| TAN                 | 1       | 0.02381 | 0.05357 | 0.05357 | 1       | 0.00549 | 0.17143 | -       | -       |  |
| TOG                 | 0.01299 | 0.00549 | 0.01299 | 0.01299 | 0.07692 | 0.00036 | 1       | 0.01299 | -       |  |
| UGA                 | 0.80861 | 0.00549 | 0.01299 | 0.11285 | 1       | 0.00036 | 0.07692 | 1       | 0.00233 |  |

N-Coumaroyl-L-aspartate\_1

|     | CAM     | CON     | GHA     | IVC     | MAD     | SAT     | SLE     | TAN    | TOG    |  |
|-----|---------|---------|---------|---------|---------|---------|---------|--------|--------|--|
| CON | 0.56044 | -       | -       | -       | -       | -       | -       | -      | -      |  |
| GHA | 0.06767 | 0.03297 | -       | -       | -       | -       | -       | -      | -      |  |
| IVC | 0.06767 | 0.44048 | 0.06767 | -       | -       | -       | -       | -      | -      |  |
| MAD | 0.17859 | 0.13393 | 0.17859 | 0.17859 | -       | -       | -       | -      | -      |  |
| SAT | 0.11913 | 0.02133 | 0.00824 | 0.00824 | 0.06593 | -       | -       | -      | -      |  |
| SLE | 0.17859 | 0.13393 | 0.17859 | 0.17859 | 0.42857 | 0.06593 | -       | -      | -      |  |
| TAN | 0.17859 | 0.56044 | 0.06767 | 0.56044 | 0.17859 | 0.00824 | 0.17859 | -      | -      |  |
| TOG | 0.0202  | 0.00824 | 0.0303  | 0.0202  | 0.09524 | 0.00071 | 0.09524 | 0.0202 | -      |  |
| UGA | 1       | 1       | 0.0303  | 1       | 1       | 0.17859 | 0.8     | 1      | 0.0035 |  |

N-Caffeoyl-L-aspartate

|     | CAM     | CON     | GHA     | IVC     | MAD     | SAT     | SLE     | TAN     | TOG   |  |
|-----|---------|---------|---------|---------|---------|---------|---------|---------|-------|--|
| CON | 0.02521 | -       | -       | -       | -       | -       | -       | -       | -     |  |
| GHA | 0.05844 | 0.02521 | -       | -       | -       | -       | -       | -       | -     |  |
| IVC | 1       | 0.02521 | 0.05844 | -       | -       | -       | -       | -       | -     |  |
| MAD | 0.16667 | 0.12363 | 0.16667 | 0.16667 | -       | -       | -       | -       | -     |  |
| SAT | 0.00549 | 0.00162 | 0.00549 | 0.00549 | 0.65067 | -       | -       | -       | -     |  |
| SLE | 1       | 0.12363 | 0.16667 | 0.16667 | 0.40541 | 0.05495 | -       | -       | -     |  |
| TAN | 1       | 0.02521 | 0.05844 | 0.05844 | 0.16667 | 0.00549 | 0.16667 | -       | -     |  |
| TOG | 1       | 0.00549 | 0.01399 | 0.16667 | 0.08333 | 0.00036 | 0.14286 | 0.01399 | -     |  |
| UGA | 1       | 0.00549 | 0.01399 | 1       | 0.08333 | 0.00036 | 0.14286 | 0.01399 | 0.662 |  |

Catechin

|     | CAM     | CON     | GHA     | IVC     | MAD     | SAT     | SLE     | TAN    | TOG |  |
|-----|---------|---------|---------|---------|---------|---------|---------|--------|-----|--|
| CON | 0.1875  | -       | -       | -       | -       | -       | -       | -      | -   |  |
| GHA | 0.12245 | 0.04762 | -       | -       | -       | -       | -       | -      | -   |  |
| IVC | 0.08036 | 0.23377 | 0.08036 | -       | -       | -       | -       | -      | -   |  |
| MAD | 0.1875  | 0.13975 | 0.1875  | 0.1875  | -       | -       | -       | -      | -   |  |
| SAT | 0.00168 | 0.03047 | 0.00168 | 0.00168 | 0.08036 | -       | -       | -      | -   |  |
| SLE | 0.1875  | 0.13975 | 0.1875  | 0.1875  | 0.44118 | 0.68825 | -       | -      | -   |  |
| TAN | 0.08036 | 0.04762 | 0.08036 | 0.08036 | 0.1875  | 0.4739  | 0.90909 | -      | -   |  |
| TOG | 0.7464  | 0.44356 | 0.0303  | 0.0303  | 0.10526 | 0.00071 | 0.10526 | 0.0303 | -   |  |
| UGA | 0.90909 | 0.93492 | 0.10909 | 1       | 0.10526 | 0.0558  | 1       | 1      | 1   |  |

PCA\_hexoside\_1

|     | CAM     | CON     | GHA     | IVC     | MAD     | SAT     | SLE     | TAN     | TOG     |  |
|-----|---------|---------|---------|---------|---------|---------|---------|---------|---------|--|
| CON | 0.16667 | -       | -       | -       | -       | -       | -       | -       | -       |  |
| GHA | 0.0559  | 0.02381 | -       | -       | -       | -       | -       | -       | -       |  |
| IVC | 1       | 0.02381 | 0.0559  | -       | -       | -       | -       | -       | -       |  |
| MAD | 0.16667 | 0.1148  | 0.16667 | 0.16667 | -       | -       | -       | -       | -       |  |
| SAT | 0.00495 | 0.00162 | 0.00495 | 0.00495 | 0.63398 | -       | -       | -       | -       |  |
| SLE | 1       | 0.72321 | 0.16667 | 0.16667 | 0.40541 | 0.05205 | -       | -       | -       |  |
| TAN | 1       | 0.56391 | 0.0559  | 0.0559  | 0.16667 | 0.00495 | 0.16667 | -       | -       |  |
| TOG | 1       | 0.00495 | 0.01136 | 0.01136 | 0.07407 | 0.00036 | 0.07407 | 0.01136 | -       |  |
| UGA | 1       | 0.00495 | 0.01136 | 0.01136 | 0.07407 | 0.00036 | 0.07407 | 0.01136 | 0.00175 |  |

Catechin-3-O-glucoside

|     | CAM     | CON     | GHA     | IVC     | MAD     | SAT     | SLE     | TAN     | TOG     |  |
|-----|---------|---------|---------|---------|---------|---------|---------|---------|---------|--|
| CON | 0.45306 | -       | -       | -       | -       | -       | -       | -       | -       |  |
| GHA | 0.06122 | 0.02857 | -       | -       | -       | -       | -       | -       | -       |  |
| IVC | 1       | 0.57915 | 0.06122 | -       | -       | -       | -       | -       | -       |  |
| MAD | 0.63158 | 0.73221 | 0.19355 | 0.19355 | -       | -       | -       | -       | -       |  |
| SAT | 0.00618 | 0.12524 | 0.00618 | 0.00618 | 0.05818 | -       | -       | -       | -       |  |
| SLE | 1       | 0.72321 | 0.19355 | 0.19355 | 0.45306 | 0.05818 | -       | -       | -       |  |
| TAN | 1       | 0.57915 | 0.06122 | 0.06122 | 0.19355 | 0.00618 | 0.19355 | -       | -       |  |
| TOG | 1       | 0.45306 | 0.01299 | 0.01299 | 0.16    | 0.00036 | 0.375   | 0.01299 | -       |  |
| UGA | 0.01299 | 0.00618 | 1       | 0.01299 | 0.08696 | 0.00036 | 0.08696 | 0.01299 | 0.00233 |  |

Quercetin

|     | CAM     | CON     | GHA     | IVC     | MAD     | SAT     | SLE     | TAN     | TOG     |  |
|-----|---------|---------|---------|---------|---------|---------|---------|---------|---------|--|
| CON | 0.08    | -       | -       | -       | -       | -       | -       | -       | -       |  |
| GHA | 1       | 0.02857 | -       | -       | -       | -       | -       | -       | -       |  |
| IVC | 0.40602 | 0.02857 | 0.06767 | -       | -       | -       | -       | -       | -       |  |
| MAD | 0.17143 | 0.1148  | 0.17143 | 0.17143 | -       | -       | -       | -       | -       |  |
| SAT | 0.00549 | 0.1148  | 0.00549 | 0.00549 | 0.76078 | -       | -       | -       | -       |  |
| SLE | 1       | 0.1148  | 0.17143 | 0.17143 | 0.40541 | 0.06181 | -       | -       | -       |  |
| TAN | 1       | 0.08    | 0.06767 | 0.06767 | 0.17143 | 0.00549 | 0.17143 | -       | -       |  |
| TOG | 0.76818 | 0.00549 | 1       | 0.26768 | 0.08    | 0.00036 | 0.08    | 0.01399 | -       |  |
| UGA | 1       | 0.00549 | 0.01399 | 0.01399 | 0.08    | 0.00036 | 0.08    | 0.01399 | 0.00233 |  |

PCB\_trimer\_1

|     | CAM     | CON     | GHA     | IVC     | MAD     | SAT     | SLE     | TAN     | TOG     |  |
|-----|---------|---------|---------|---------|---------|---------|---------|---------|---------|--|
| CON | 0.02857 | -       | -       | -       | -       | -       | -       | -       | -       |  |
| GHA | 1       | 0.02857 | -       | -       | -       | -       | -       | -       | -       |  |
| IVC | 0.05844 | 0.52265 | 0.05844 | -       | -       | -       | -       | -       | -       |  |
| MAD | 0.15789 | 0.10909 | 0.15789 | 0.15789 | -       | -       | -       | -       | -       |  |
| SAT | 0.00706 | 0.00162 | 0.00706 | 0.00706 | 0.5887  | -       | -       | -       | -       |  |
| SLE | 1       | 0.10909 | 0.30769 | 0.15789 | 0.375   | 0.05818 | -       | -       | -       |  |
| TAN | 0.05844 | 0.02857 | 0.05844 | 0.05844 | 0.15789 | 0.14526 | 0.15789 | -       | -       |  |
| TOG | 0.10909 | 0.00706 | 0.01515 | 0.01515 | 0.07692 | 0.00036 | 0.07692 | 0.01515 | -       |  |
| UGA | 0.10909 | 0.11795 | 0.01515 | 0.04545 | 0.07692 | 0.00036 | 0.07692 | 0.01515 | 0.67539 |  |

PCB\_trimer\_6

|     | CAM   | CON   | GHA   | IVC   | MAD   | SAT   | SLE   | TAN   | TOG   |  |
|-----|-------|-------|-------|-------|-------|-------|-------|-------|-------|--|
| CON | 1     | -     | -     | -     | -     | -     | -     | -     | -     |  |
| GHA | 1     | 0.612 | -     | -     | -     | -     | -     | -     | -     |  |
| IVC | 1     | 0.612 | 1     | -     | -     | -     | -     | -     | -     |  |
| MAD | 0.207 | 0.161 | 0.207 | 0.207 | -     | -     | -     | -     | -     |  |
| SAT | 0.154 | 0.161 | 0.066 | 0.125 | 0.651 | -     | -     | -     | -     |  |
| SLE | 0.651 | 0.161 | 0.207 | 0.207 | 0.469 | 0.651 | -     | -     | -     |  |
| TAN | 0.107 | 0.054 | 0.107 | 0.107 | 0.207 | 0.207 | 0.207 | -     | -     |  |
| TOG | 0.909 | 0.661 | 0.026 | 0.026 | 0.125 | 0.345 | 0.19  | 0.026 | -     |  |
| UGA | 1     | 0.47  | 0.026 | 0.026 | 0.125 | 0.345 | 0.125 | 0.026 | 0.026 |  |

N-Coumaroyl-L-aspartate\_2

|     | CAM     | CON     | GHA     | IVC     | MAD     | SAT     | SLE     | TAN     | TOG     |  |
|-----|---------|---------|---------|---------|---------|---------|---------|---------|---------|--|
| CON | 0.02381 | -       | -       | -       | -       | -       | -       | -       | -       |  |
| GHA | 0.16216 | 0.02381 | -       | -       | -       | -       | -       | -       | -       |  |
| IVC | 1       | 0.02381 | 0.05357 | -       | -       | -       | -       | -       | -       |  |
| MAD | 0.16216 | 0.10714 | 0.16216 | 0.16216 | -       | -       | -       | -       | -       |  |
| SAT | 0.00549 | 0.33551 | 0.00549 | 0.00549 | 0.5887  | -       | -       | -       | -       |  |
| SLE | 1       | 0.10714 | 0.16216 | 0.31579 | 0.375   | 0.04945 | -       | -       | -       |  |
| TAN | 0.05357 | 0.02381 | 0.05357 | 0.05357 | 0.16216 | 0.00549 | 0.16216 | -       | -       |  |
| TOG | 1       | 0.00549 | 0.01299 | 0.01299 | 0.07143 | 0.00036 | 0.07143 | 0.01299 | -       |  |
| UGA | 0.50554 | 0.00549 | 0.01299 | 0.01299 | 0.07143 | 0.00036 | 0.07143 | 0.03828 | 0.00233 |  |

PCB\_trimer\_2

|     | CAM   | CON   | GHA   | IVC   | MAD   | SAT   | SLE   | TAN   | TOG   |  |
|-----|-------|-------|-------|-------|-------|-------|-------|-------|-------|--|
| CON | 0.039 | -     | -     | -     | -     | -     | -     | -     | -     |  |
| GHA | 0.071 | 0.039 | -     | -     | -     | -     | -     | -     | -     |  |
| IVC | 0.071 | 0.039 | 0.071 | -     | -     | -     | -     | -     | -     |  |
| MAD | 0.188 | 0.14  | 0.188 | 0.188 | -     | -     | -     | -     | -     |  |
| SAT | 0.146 | 0.836 | 0.012 | 0.012 | 0.634 | -     | -     | -     | -     |  |
| SLE | 0.188 | 0.367 | 0.188 | 0.188 | 0.417 | 0.634 | -     | -     | -     |  |
| TAN | 0.071 | 0.836 | 0.071 | 0.071 | 0.188 | 0.461 | 0.188 | -     | -     |  |
| TOG | 0.023 | 0.012 | 0.023 | 0.023 | 0.091 | 0.315 | 0.091 | 0.023 | -     |  |
| UGA | 1     | 0.091 | 1     | 1     | 0.091 | 0.239 | 1     | 0.071 | 0.012 |  |

PCB

|     | CAM     | CON     | GHA     | IVC     | MAD     | SAT     | SLE     | TAN     | TOG     |  |
|-----|---------|---------|---------|---------|---------|---------|---------|---------|---------|--|
| CON | 0.02857 | -       | -       | -       | -       | -       | -       | -       | -       |  |
| GHA | 0.05844 | 0.02857 | -       | -       | -       | -       | -       | -       | -       |  |
| IVC | 1       | 0.02857 | 0.05844 | -       | -       | -       | -       | -       | -       |  |
| MAD | 0.17647 | 0.12363 | 0.17647 | 0.17647 | -       | -       | -       | -       | -       |  |
| SAT | 0.00989 | 0.08    | 0.00989 | 0.00989 | 0.5887  | -       | -       | -       | -       |  |
| SLE | 0.17647 | 0.48214 | 0.17647 | 0.17647 | 0.39474 | 0.5748  | -       | -       | -       |  |
| TAN | 0.05844 | 0.32143 | 0.05844 | 0.05844 | 0.17647 | 0.09811 | 0.17647 | -       | -       |  |
| TOG | 0.01653 | 0.47722 | 0.01653 | 0.01653 | 0.08    | 0.00036 | 0.58537 | 0.01653 | -       |  |
| UGA | 0.27532 | 0.05619 | 0.01653 | 0.84567 | 0.08    | 0.00036 | 0.32432 | 0.01653 | 0.01748 |  |

Epicatechin

|     | CAM     | CON     | GHA     | IVC     | MAD    | SAT | SLE | TAN | TOG |  |
|-----|---------|---------|---------|---------|--------|-----|-----|-----|-----|--|
| CON | 0.14286 | -       | -       | -       | -      | -   | -   | -   | -   |  |
| GHA | 0.04945 | 0.02556 | -       | -       | -      | -   | -   | -   | -   |  |
| IVC | 0.7013  | 0.02256 | 0.04945 | -       | -      | -   | -   | -   | -   |  |
| MAD | 0.14286 | 0.10045 | 0.14286 | 0.14286 | -      | -   | -   | -   | -   |  |
| SAT | 0.00549 | 0.00162 | 0.00549 | 0.00549 | 0.6471 | -   | -   | -   | -   |  |
| SLE | 0.14286 | 0.10045 | 0.14286 | 0.14286 | 0.34   |     |     |     |     |  |



**Table S4.** Pairwise comparison of the phenolic compounds quantified in CBSs by RP-HPLC-PDA that could be used as potential geographical origin markers for different countries within the American continent.

| Protocatechuic_acid       |         |          |          |         |         |         |          |
|---------------------------|---------|----------|----------|---------|---------|---------|----------|
|                           | BRA     | COL      | DOR      | ECU     | JAM     | MEX     | PER      |
| COL                       | 0.00665 | -        | -        | -       | -       | -       | -        |
| DOR                       | 0.00203 | 0.00665  | -        | -       | -       | -       | -        |
| ECU                       | 0.00062 | 0.26582  | 0.01404  | -       | -       | -       | -        |
| JAM                       | 0.03333 | 0.00665  | 0.0122   | 0.02765 | -       | -       | -        |
| MEX                       | 0.03333 | 0.00665  | 0.00203  | 0.00062 | 0.03333 | -       | -        |
| PER                       | 0.00665 | 0.02765  | 0.00024  | 0.1995  | 0.00665 | 0.00665 | -        |
| VEN                       | 0.00163 | 0.00665  | 2.10E-07 | 0.07636 | 0.00024 | 0.00024 | 0.77807  |
| N-Coumaroyl-L-aspartate_1 |         |          |          |         |         |         |          |
|                           | BRA     | COL      | DOR      | ECU     | JAM     | MEX     | PER      |
| COL                       | 0.00943 | -        | -        | -       | -       | -       | -        |
| DOR                       | 0.00305 | 0.97338  | -        | -       | -       | -       | -        |
| ECU                       | 0.00187 | 0.17333  | 0.04875  | -       | -       | -       | -        |
| JAM                       | 0.04875 | 0.00943  | 0.00305  | 0.0025  | -       | -       | -        |
| MEX                       | 0.04875 | 0.00943  | 0.00305  | 0.18223 | 0.04875 | -       | -        |
| PER                       | 0.00943 | 0.19012  | 0.07803  | 0.19012 | 0.00943 | 0.00943 | -        |
| VEN                       | 0.03766 | 0.92114  | 0.97338  | 0.19012 | 0.00095 | 0.19012 | 0.55508  |
| N-Caffeoyl-L-aspartate    |         |          |          |         |         |         |          |
|                           | BRA     | COL      | DOR      | ECU     | JAM     | MEX     | PER      |
| COL                       | 0.0087  | -        | -        | -       | -       | -       | -        |
| DOR                       | 0.00203 | 0.6903   | -        | -       | -       | -       | -        |
| ECU                       | 0.00062 | 0.05827  | 0.06292  | -       | -       | -       | -        |
| JAM                       | 0.04706 | 1        | 0.85943  | 0.06404 | -       | -       | -        |
| MEX                       | 0.04706 | 0.0087   | 0.00203  | 0.00062 | 0.04706 | -       | -        |
| PER                       | 0.0087  | 1        | 0.22838  | 0.01986 | 0.09256 | 0.0087  | -        |
| VEN                       | 0.00032 | 0.05079  | 0.00089  | 0.63787 | 0.00032 | 0.00032 | 0.00059  |
| Catechin                  |         |          |          |         |         |         |          |
|                           | BRA     | COL      | DOR      | ECU     | JAM     | MEX     | PER      |
| COL                       | 0.01886 | -        | -        | -       | -       | -       | -        |
| DOR                       | 0.0061  | 0.20529  | -        | -       | -       | -       | -        |
| ECU                       | 0.00187 | 0.15817  | 0.72262  | -       | -       | -       | -        |
| JAM                       | 0.0834  | 1        | 0.37744  | 0.72262 | -       | -       | -        |
| MEX                       | 0.0834  | 1        | 0.15817  | 0.37744 | 0.0834  | -       | -        |
| PER                       | 0.01886 | 0.37744  | 0.99113  | 0.72262 | 0.3527  | 0.01886 | -        |
| VEN                       | 0.00095 | 0.0834   | 0.37744  | 0.79231 | 0.10236 | 0.10236 | 0.34485  |
| PCA_hexoside_1            |         |          |          |         |         |         |          |
|                           | BRA     | COL      | DOR      | ECU     | JAM     | MEX     | PER      |
| COL                       | 0.00754 | -        | -        | -       | -       | -       | -        |
| DOR                       | 0.00229 | 8.80E-05 | -        | -       | -       | -       | -        |
| ECU                       | 0.00075 | 0.03211  | 0.97258  | -       | -       | -       | -        |
| JAM                       | 0.0381  | 0.00754  | 0.97258  | 0.97258 | -       | -       | -        |
| MEX                       | 0.0381  | 0.00754  | 0.00229  | 0.00075 | 0.0381  | -       | -        |
| PER                       | 0.00754 | 0.27358  | 8.80E-05 | 0.02008 | 0.00754 | 0.00754 | -        |
| VEN                       | 0.02008 | 0.0024   | 0.10165  | 0.05258 | 0.27726 | 0.00032 | 0.00108  |
| Catechin-3-O-glucoside    |         |          |          |         |         |         |          |
|                           | BRA     | COL      | DOR      | ECU     | JAM     | MEX     | PER      |
| COL                       | 0.93333 | -        | -        | -       | -       | -       | -        |
| DOR                       | 0.06062 | 0.08262  | -        | -       | -       | -       | -        |
| ECU                       | 0.32061 | 0.24189  | 0.01049  | -       | -       | -       | -        |
| JAM                       | 0.05333 | 0.01049  | 0.31024  | 0.00095 | -       | -       | -        |
| MEX                       | 0.05333 | 0.01049  | 0.00366  | 0.00095 | 0.05333 | -       | -        |
| PER                       | 0.93333 | 0.76636  | 0.00366  | 0.2504  | 0.01049 | 0.01049 | -        |
| VEN                       | 0.32745 | 0.25957  | 0.01049  | 0.44396 | 0.00095 | 0.00095 | 0.34186  |
| Quercetin                 |         |          |          |         |         |         |          |
|                           | BRA     | COL      | DOR      | ECU     | JAM     | MEX     | PER      |
| COL                       | 0.01131 | -        | -        | -       | -       | -       | -        |
| DOR                       | 0.6695  | 0.37337  | -        | -       | -       | -       | -        |
| ECU                       | 1       | 0.05255  | 0.43574  | -       | -       | -       | -        |
| JAM                       | 0.05714 | 0.46795  | 0.85943  | 0.24722 | -       | -       | -        |
| MEX                       | 0.05714 | 0.01131  | 0.00366  | 0.00094 | 0.05714 | -       | -        |
| PER                       | 0.01131 | 0.34558  | 0.63934  | 0.09986 | 1       | 0.01131 | -        |
| VEN                       | 0.72202 | 1.40E-05 | 0.09986  | 0.27939 | 0.00602 | 0.00032 | 5.00E-05 |
| PCB_trimer_1              |         |          |          |         |         |         |          |
|                           | BRA     | COL      | DOR      | ECU     | JAM     | MEX     | PER      |
| COL                       | 1       | -        | -        | -       | -       | -       | -        |
| DOR                       | 0.61856 | 0.99113  | -        | -       | -       | -       | -        |
| ECU                       | 0.5183  | 0.34514  | 0.32418  | -       | -       | -       | -        |
| JAM                       | 0.06154 | 0.01131  | 0.00305  | 0.00094 | -       | -       | -        |
| MEX                       | 0.06154 | 0.01131  | 0.00305  | 0.00094 | 0.06154 | -       | -        |
| PER                       | 0.7596  | 1        | 0.32418  | 0.32418 | 0.01131 | 0.01131 | -        |
| VEN                       | 0.92117 | 0.34514  | 0.88715  | 0.95717 | 0.00048 | 0.00048 | 0.91638  |
| PCB_trimer_6              |         |          |          |         |         |         |          |
|                           | BRA     | COL      | DOR      | ECU     | JAM     | MEX     | PER      |
| COL                       | 0.01028 | -        | -        | -       | -       | -       | -        |
| DOR                       | 0.00366 | 0.27795  | -        | -       | -       | -       | -        |
| ECU                       | 0.07819 | 0.02587  | 0.00576  | -       | -       | -       | -        |
| JAM                       | 0.04706 | 0.01028  | 0.10488  | 0.86502 | -       | -       | -        |
| MEX                       | 0.04706 | 0.01028  | 0.00366  | 0.61052 | 0.04706 | -       | -        |
| PER                       | 0.01028 | 1        | 0.27795  | 0.08913 | 0.9679  | 0.01028 | -        |
| VEN                       | 0.08421 | 1.50E-06 | 2.10E-07 | 0.02673 | 0.01909 | 0.10488 | 0.00051  |
| N-Coumaroyl-L-aspartate_2 |         |          |          |         |         |         |          |
|                           | BRA     | COL      | DOR      | ECU     | JAM     | MEX     | PER      |
| COL                       | 0.01028 | -        | -        | -       | -       | -       | -        |
| DOR                       | 0.00261 | 0.01156  | -        | -       | -       | -       | -        |
| ECU                       | 0.00075 | 0.53208  | 0.06623  | -       | -       | -       | -        |
| JAM                       | 0.05    | 0.01028  | 0.77637  | 0.06724 | -       | -       | -        |
| MEX                       | 0.05    | 0.83801  | 0.05471  | 0.12208 | 0.05    | -       | -        |
| PER                       | 0.01028 | 0.19543  | 0.05471  | 0.05    | 0.01028 | 1       | -        |
| VEN                       | 0.00032 | 0.11724  | 0.00037  | 0.38674 | 0.00032 | 0.00111 | 0.00025  |
| PCB_trimer_2              |         |          |          |         |         |         |          |
|                           | BRA     | COL      | DOR      | ECU     | JAM     | MEX     | PER      |
| COL                       | 1       | -        | -        | -       | -       | -       | -        |
| DOR                       | 0.06062 | 0.16207  | -        | -       | -       | -       | -        |
| ECU                       | 0.50363 | 1        | 0.03645  | -       | -       | -       | -        |
| JAM                       | 0.05333 | 0.01131  | 0.00366  | 0.00795 | -       | -       | -        |
| MEX                       | 0.05333 | 1        | 0.29614  | 0.22098 | 0.05333 | -       | -        |
| PER                       | 1       | 0.16207  | 0.00293  | 0.19538 | 0.01131 | 0.01131 | -        |
| VEN                       | 0.00795 | 0.02473  | 0.69453  | 0.00197 | 0.00048 | 0.1067  | 0.00048  |
| PCB                       |         |          |          |         |         |         |          |
|                           | BRA     | COL      | DOR      | ECU     | JAM     | MEX     | PER      |
| COL                       | 0.01257 | -        | -        | -       | -       | -       | -        |
| DOR                       | 0.00458 | 0.51186  | -        | -       | -       | -       | -        |
| ECU                       | 0.00187 | 0.42694  | 0.14592  | -       | -       | -       | -        |
| JAM                       | 0.05714 | 0.01257  | 0.00458  | 0.01257 | -       | -       | -        |
| MEX                       | 0.05714 | 0.6903   | 0.77637  | 0.42694 | 0.05714 | -       | -        |
| PER                       | 0.01257 | 1        | 0.6903   | 0.6903  | 0.01257 | 1       | -        |
| VEN                       | 0.00095 | 0.06671  | 0.03345  | 0.12914 | 0.02805 | 0.16992 | 0.14726  |
| Epicatechin               |         |          |          |         |         |         |          |
|                           | BRA     | COL      | DOR      | ECU     | JAM     | MEX     | PER      |
| COL                       | 0.00808 | -        | -        | -       | -       | -       | -        |
| DOR                       | 0.00261 | 0.00925  | -        | -       | -       | -       | -        |
| ECU                       | 0.00094 | 0.04     | 0.69001  | -       | -       | -       | -        |
| JAM                       | 0.04    | 0.00808  | 0.02059  | 0.00749 | -       | -       | -        |
| MEX                       | 0.04    | 1        | 0.28326  | 0.00094 | 0.04    | -       | -        |
| PER                       | 0.00808 | 0.61787  | 0.13997  | 0.34754 | 0.00808 | 0.00808 | -        |
| VEN                       | 0.00048 | 0.00129  | 0.12347  | 0.00588 | 0.50432 | 0.00048 | 0.00129  |
| N-Coumaroyl-L-glutamate   |         |          |          |         |         |         |          |
|                           | BRA     | COL      | DOR      | ECU     | JAM     | MEX     | PER      |
| COL                       | 0.9333  | -        | -        | -       | -       | -       | -        |
| DOR                       | 0.0693  | 0.1478   | -        | -       | -       | -       | -        |
| ECU                       | 0.2541  | 0.8241   | 0.0774   | -       | -       | -       | -        |
| JAM                       | 0.0667  | 0.0323   | 0.8074   | 0.0693  | -       | -       | -        |
| MEX                       | 0.0667  | 0.0226   | 0.3258   | 0.00397 | 0.0667  | -       | -        |
| PER                       | 0.03236 | 0.0827   | 0.7966   | 0.0827  | 0.7966  | 0.0226  | -        |
| VEN                       | 0.4204  | 0.8601   | 0.0428   | 0.596   | 0.0455  | 0.0307  | 0.0226   |
| PCB_trimer_3              |         |          |          |         |         |         |          |
|                           | BRA     | COL      | DOR      | ECU     | JAM     | MEX     | PER      |
| COL                       | 0.01616 | -        | -        | -       | -       | -       | -        |
| DOR                       | 0.01165 | 8.80E-05 | -        | -       | -       | -       | -        |
| ECU                       | 0.53357 | 0.01616  | 0.03306  | -       | -       | -       | -        |
| JAM                       | 0.14545 | 0.31677  | 0.00261  | 0.23941 | -       | -       | -        |
| MEX                       | 0.08421 | 0.0115   | 0.11072  | 0.4191  | 0.04444 | -       | -        |
| PER                       | 0.5697  | 0.00653  | 0.00042  | 0.29905 | 0.14545 | 0.01616 | -        |
| VEN                       | 0.0115  | 2.90E-06 | 0.03513  | 0.00024 | 0.00111 | 0.02275 | 0.00024  |
| PCB_trimer_4              |         |          |          |         |         |         |          |
|                           | BRA     | COL      | DOR      | ECU     | JAM     | MEX     | PER      |
| COL                       | 0.00808 | -        | -        | -       | -       | -       | -        |
| DOR                       | 0.00261 | 0.00053  | -        | -       | -       | -       | -        |
| ECU                       | 0.00075 | 1.30E-05 | 0.37312  | -       | -       | -       | -        |
| JAM                       | 0.04211 | 0.00808  | 0.06497  | 0.00674 | -       | -       | -        |
| MEX                       | 0.04211 | 0.12727  | 0.07479  | 0.07338 | 0.04211 | -       | -        |
| PER                       | 0.00808 | 0.06651  | 0.00285  | 0.00209 | 0.00808 | 0.30458 | -        |
| VEN                       | 0.01753 | 7.30E-07 | 0.13302  | 0.01696 | 0.61007 | 0.00285 | 2.50E-06 |
| PCB_trimer_5              |         |          |          |         |         |         |          |
|                           | BRA     | COL      | DOR      | ECU     | JAM     | MEX     | PER      |
| COL                       | 0.0132  | -        | -        | -       | -       | -       | -        |
| DOR                       | 1       | 0.0139   | -        | -       | -       | -       | -        |
| ECU                       | 0.1844  | 0.0015   | 0.0362   | -       | -       | -       | -        |
| JAM                       | 0.0571  | 0.0132   | 0.0046   | 0.3603  | -       | -       | -        |
| MEX                       | 0.0571  | 1        | 0.3258   | 0.0015  | 0.0571  | -       | -        |
| PER                       | 0.1273  | 0.0015   | 0.1969   | 0.3603  | 0.0132  | 0.0132  | -        |
| VEN                       | 0.8427  | 0.0132   | 0.2646   | 0.4476  | 0.634   | 0.1209  | 0.9492   |
| PCA_pentoseide_1          |         |          |          |         |         |         |          |
|                           | BRA     | COL      | DOR      | ECU     | JAM     | MEX     | PER      |
| COL                       | 0.057   | -        | -        | -       | -       | -       | -        |
| DOR                       | 0.16    | 0.765    | -        | -       | -       | -       | -        |
| ECU                       | 0.224   | 0.801    | 0.627    | -       | -       | -       | -        |
| JAM                       | 0.16    | 1        | 0.765    | 0.923   | -       | -       | -        |
| MEX                       | 0.16    | 1        | 0.984    | 0.627   | 0.229   | -       | -        |
| PER                       | 0.057   | 0.765    | 0.308    | 0.976   | 1       | 0.255   | -        |
| VEN                       | 0.627   | 0.627    | 0.303    | 0.627   | 0.765   | 0.529   | 0.765    |
| PCB_trimer_7              |         |          |          |         |         |         |          |
|                           | BRA     | COL      | DOR      | ECU     | JAM     | MEX     | PER      |
| COL                       | 0.01187 | -        | -        | -       | -       | -       | -        |
| DOR                       | 0.01187 | 0.87813  | -        | -       | -       | -       | -        |
| ECU                       | 0.46586 | 0.08768  | 0.04069  | -       | -       | -       | -        |
| JAM                       | 0.05    | 0.01886  | 0.05705  | 0.87813 | -       | -       | -        |
| MEX                       | 0.05    | 0.01187  | 0.01187  | 0.00094 | 0.05    | -       | -        |
| PER                       | 1       | 0.01187  | 0.00904  | 0.7123  | 0.9679  | 0.01187 | -        |
| VEN                       | 0.6304  | 0.00092  | 0.00092  | 0.72581 | 0.84894 | 0.00092 | 0        |

**Table S5.** Pairwise comparison of the phenolic compounds quantified in CBSs by RP-HPLC-PDA that could be used as potential markers for cultivars among Ecuadorian samples.

| Protocatechuic_acid |         |           |          |
|---------------------|---------|-----------|----------|
|                     | Criollo | Forastero | Nacional |
| Forastero           | 0.79    | -         | -        |
| Nacional            | 0.57    | 0.57      | -        |
| Trinitario          | 0.57    | 0.57      | 0.89     |

| N-Coumaroyl-L-aspartate_1 |         |           |          |
|---------------------------|---------|-----------|----------|
|                           | Criollo | Forastero | Nacional |
| Forastero                 | 0.13    | -         | -        |
| Nacional                  | 0.27    | 0.95      | -        |
| Trinitario                | 0.27    | 0.57      | 0.58     |

| N-Caffeoyl-L-aspartate |         |           |          |
|------------------------|---------|-----------|----------|
|                        | Criollo | Forastero | Nacional |
| Forastero              | 0.5495  | -         | -        |
| Nacional               | 0.16    | 0.1165    | -        |
| Trinitario             | 0.16    | 0.0066    | 0.0857   |

| Catechin   |         |           |          |
|------------|---------|-----------|----------|
|            | Criollo | Forastero | Nacional |
| Forastero  | 0.13    | -         | -        |
| Nacional   | 0.16    | 0.16      | -        |
| Trinitario | 0.16    | 0.16      | 0.49     |

| PCA_hexoside_1 |         |           |          |
|----------------|---------|-----------|----------|
|                | Criollo | Forastero | Nacional |
| Forastero      | 0.5495  | -         | -        |
| Nacional       | 0.2     | 0.4549    | -        |
| Trinitario     | 0.2     | 0.0066    | 0.0857   |

| Catechin-3-O-glucoside |         |           |          |
|------------------------|---------|-----------|----------|
|                        | Criollo | Forastero | Nacional |
| Forastero              | 0.6593  | -         | -        |
| Nacional               | 0.2     | 0.9527    | -        |
| Trinitario             | 0.2     | 0.0066    | 0.0857   |

| Quercetin  |         |           |          |
|------------|---------|-----------|----------|
|            | Criollo | Forastero | Nacional |
| Forastero  | 0.64    | -         | -        |
| Nacional   | 0.64    | 0.95      | -        |
| Trinitario | 0.64    | 0.64      | 0.64     |

| PCB_trimer_1 |         |           |          |
|--------------|---------|-----------|----------|
|              | Criollo | Forastero | Nacional |
| Forastero    | 0.5495  | -         | -        |
| Nacional     | 0.2     | 0.4549    | -        |
| Trinitario   | 0.2     | 0.0066    | 0.0857   |

| PCB_trimer_6 |         |           |          |
|--------------|---------|-----------|----------|
|              | Criollo | Forastero | Nacional |
| Forastero    | 0.033   | -         | -        |
| Nacional     | 0.1333  | 0.0066    | -        |
| Trinitario   | 0.0663  | 0.0123    | 0.033    |

|  | | | |

| N-Coumaroyl-L-aspartate_2 |         |           |          |
|---------------------------|---------|-----------|----------|
|                           | Criollo | Forastero | Nacional |
| Forastero                 | 0.66    | -         | -        |
| Nacional                  | 0.2     | 1         | -        |
| Trinitario                | 0.2     | 0.2       | 0.17     |

| PCB_trimer_2 |         |           |          |
|--------------|---------|-----------|----------|
|              | Criollo | Forastero | Nacional |
| Forastero    | 0.044   | -         | -        |
| Nacional     | 0.1203  | 0.013     | -        |
| Trinitario   | 0.1333  | 0.0066    | 0.0441   |

| PCB        |         |           |          |
|------------|---------|-----------|----------|
|            | Criollo | Forastero | Nacional |
| Forastero  | 0.044   | -         | -        |
| Nacional   | 0.16    | 0.0033    | -        |
| Trinitario | 0.16    | 0.0033    | 1        |

|  | | | |

| Epicatechin |         |           |          |
|-------------|---------|-----------|----------|
|             | Criollo | Forastero | Nacional |
| Forastero   | 0.8242  | -         | -        |
| Nacional    | 1       | 1         | -        |
| Trinitario  | 0.2667  | 0.0066    | 0.0857   |

| N-Coumaroyl-L-glutamate |         |           |          |
|-------------------------|---------|-----------|----------|
|                         | Criollo | Forastero | Nacional |
| Forastero               | 0.5275  | -         | -        |
| Nacional                | 0.8     | 0.1165    | -        |
| Trinitario              | 0.2     | 0.0066    | 0.0857   |

|  | | | |

| PCB_trimer_3 |         |           |          |
|--------------|---------|-----------|----------|
|              | Criollo | Forastero | Nacional |
| Forastero    | 0.0659  | -         | -        |
| Nacional     | 1       | 0.5687    | -        |
| Trinitario   | 0.2667  | 0.0066    | 1        |

| PCB_trimer_4 |         |           |          |
|--------------|---------|-----------|----------|
|              | Criollo | Forastero | Nacional |
| Forastero    | 0.659   | -         | -        |
| Nacional     | 0.2     | 0.204     | -        |
| Trinitario   | 0.2     | 0.026     | 0.086    |

| PCB_trimer_5 |         |           |          |
|--------------|---------|-----------|----------|
|              | Criollo | Forastero | Nacional |
| Forastero    | 0.066   | -         | -        |
| Nacional     | 1       | 0.066     | -        |
| Trinitario   | 0.2     | 0.156     | 0.583    |

|  | | | |

| PCA_pentoside_1 |         |           |          |
|-----------------|---------|-----------|----------|
|                 | Criollo | Forastero | Nacional |
| Forastero       | 0.16    | -         | -        |
| Nacional        | 0.16    | 1         | -        |
| Trinitario      | 0.16    | 0.0066    | 0.0857   |

| PCB_trimer_7 |         |           |          |
|--------------|---------|-----------|----------|
|              | Criollo | Forastero | Nacional |
| Forastero    | 0.6593  | -         | -        |
| Nacional     | 0.2     | 0.0033    | -        |
| Trinitario   | 0.2     | 0.0033    | 1        |

| PCA_trimer_arabinside |         |           |          |
|-----------------------|---------|-----------|----------|
|                       | Criollo | Forastero | Nacional |
| Forastero             | 0.82    | -         | -        |
| Nacional              | 0.96    | 0.76      | -        |
| Trinitario            | 0.64    | 0.64      | 1        |

|  | | | |

| PCA_hexoside_2 |         |           |          |
|----------------|---------|-----------|----------|
|                | Criollo | Forastero | Nacional |
| Forastero      | 0.16    | -         | -        |
| Nacional       | 0.16    | 0.5209    | -        |
| Trinitario     | 0.16    | 0.0066    | 0.0857   |

| N-coumaroyl-L-tyrosine |         |           |          |
|------------------------|---------|-----------|----------|
|                        | Criollo | Forastero | Nacional |
| Forastero              | 0.8     | -         | -        |
| Nacional               | 0.8     | 0.8       | -        |
| Trinitario             | 0.2667  | 0.0066    | 0.0857   |

|  | | | |

| PCA_pentoside_2 |         |           |          |
|-----------------|---------|-----------|----------|
|                 | Criollo | Forastero | Nacional |
| Forastero       | 0.044   | -         | -        |
| Nacional        | 0.133   | 0.124     | -        |
| Trinitario      | 0.083   | 0.025     | 0.044    |

| Quercetin-3-O-glucoside |         |           |          |
|-------------------------|---------|-----------|----------|
|                         | Criollo | Forastero | Nacional |
| Forastero               | 0.6593  | -         | -        |
| Nacional                | 0.6593  | 0.8615    | -        |
| Trinitario              | 0.2667  | 0.0066    | 0.0857   |

|  | | | |

| Quercetin-3-O-arabinside |         |           |          |
|--------------------------|---------|-----------|----------|
|                          | Criollo | Forastero | Nacional |
| Forastero                | 0.5495  | -         | -        |
| Nacional                 | 0.2     | 0.5495    | -        |
| Trinitario               | 0.2     | 0.0066    | 0.0857   |

FDR (false discovery rate)<0.001; FDR<0.01 and FDR<0.05 are highlighted in green, yellow, and red, respectively. Compounds highlighted in bold were used to build the box plots that are displayed in the main manuscript.
